# Supplementary material for: Inspiratory muscle training protocol for patients with chronic obstructive pulmonary disease (IMTCO study): a multicentre randomised controlled trial
Source: PubMed Central journal article supplement — BMJ Open. 2013 Aug 5;3(8):e003101. doi: 10.1136/bmjopen-2013-003101 (PMC3740252; doi:10.1136/bmjopen-2013-003101), 2013-08-05
Supplement: bmjopen-2013-003101.draft_revisions.pdf [file bmjopen-2013-003101.draft_revisions.pdf]

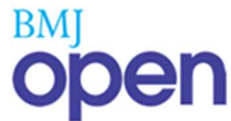

**Inspiratory muscle training protocol for patients with chronic obstructive pulmonary disease (IMTCO-study): a multicentre randomised controlled trial**

|                                 |                                                                                                                                                                                                                                                                                                                                                                                                                                                                                                                                                                                                                                                                                                                                                                                                                                                                                                                                                                                                                                                                                                                                                                                                                                                                                                                                                                                                                                                                                                                                             |
|---------------------------------|---------------------------------------------------------------------------------------------------------------------------------------------------------------------------------------------------------------------------------------------------------------------------------------------------------------------------------------------------------------------------------------------------------------------------------------------------------------------------------------------------------------------------------------------------------------------------------------------------------------------------------------------------------------------------------------------------------------------------------------------------------------------------------------------------------------------------------------------------------------------------------------------------------------------------------------------------------------------------------------------------------------------------------------------------------------------------------------------------------------------------------------------------------------------------------------------------------------------------------------------------------------------------------------------------------------------------------------------------------------------------------------------------------------------------------------------------------------------------------------------------------------------------------------------|
| Journal:                        | <i>BMJ Open</i>                                                                                                                                                                                                                                                                                                                                                                                                                                                                                                                                                                                                                                                                                                                                                                                                                                                                                                                                                                                                                                                                                                                                                                                                                                                                                                                                                                                                                                                                                                                             |
| Manuscript ID:                  | bmjopen-2013-003101                                                                                                                                                                                                                                                                                                                                                                                                                                                                                                                                                                                                                                                                                                                                                                                                                                                                                                                                                                                                                                                                                                                                                                                                                                                                                                                                                                                                                                                                                                                         |
| Article Type:                   | Protocol                                                                                                                                                                                                                                                                                                                                                                                                                                                                                                                                                                                                                                                                                                                                                                                                                                                                                                                                                                                                                                                                                                                                                                                                                                                                                                                                                                                                                                                                                                                                    |
| Date Submitted by the Author:   | 22-Apr-2013                                                                                                                                                                                                                                                                                                                                                                                                                                                                                                                                                                                                                                                                                                                                                                                                                                                                                                                                                                                                                                                                                                                                                                                                                                                                                                                                                                                                                                                                                                                                 |
| Complete List of Authors:       | Charususin, Noppawan; University of Leuven, Department of Rehabilitation Sciences; Thammasat University, Department of Physical Therapy<br>Gosselink, Rik; University of Leuven, Department of Rehabilitation Sciences; UZ Gasthuisberg, Respiratory Rehabilitation and Respiratory Division<br>Decramer, Marc; UZ Gasthuisberg, Respiratory Rehabilitation and Respiratory Division<br>McConnell, Alison; Brunel University, Centre for Sports Medicine and Human Performance<br>Saey, Didier; Laval University, Centre de recherche, Institut Universitaire de cardiologie et de pneumologie de Québec<br>Maltais, Francois; Laval University, Centre de recherche, Institut Universitaire de cardiologie et de pneumologie de Québec<br>Derom, Eric; University Hospital Ghent, Department of Pulmonology<br>Vermeersch, Stefanie; University Hospital Ghent, Department of Pulmonology<br>Helvoort, Hanneke; Radboud University Nijmegen Medical Center, Department of Pulmonary Diseases<br>Heijdra, Yvonne; Radboud University Nijmegen Medical Center, Department of Pulmonary Diseases<br>Klaassen, Mariska; Radboud University Nijmegen Medical Center, Department of Pulmonary Diseases<br>Glöckl, Rainer; Schön Klinik Berchtesgaden, Department of Respiratory Medicine & Sports Therapy<br>Kenn, Klaus; Schön Klinik Berchtesgaden, Department of Respiratory Medicine & Sports Therapy<br>Langer, Daniel; University of Leuven, Rehabilitation Sciences; UZ Gasthuisberg, Respiratory Rehabilitation and Respiratory Division |
| <b>Primary Subject Heading</b>: | Respiratory medicine                                                                                                                                                                                                                                                                                                                                                                                                                                                                                                                                                                                                                                                                                                                                                                                                                                                                                                                                                                                                                                                                                                                                                                                                                                                                                                                                                                                                                                                                                                                        |
| Secondary Subject Heading:      | Rehabilitation medicine                                                                                                                                                                                                                                                                                                                                                                                                                                                                                                                                                                                                                                                                                                                                                                                                                                                                                                                                                                                                                                                                                                                                                                                                                                                                                                                                                                                                                                                                                                                     |
| Keywords:                       | Clinical trials < THERAPEUTICS, Chronic airways disease < THORACIC MEDICINE, Emphysema < THORACIC MEDICINE                                                                                                                                                                                                                                                                                                                                                                                                                                                                                                                                                                                                                                                                                                                                                                                                                                                                                                                                                                                                                                                                                                                                                                                                                                                                                                                                                                                                                                  |
|                                 |                                                                                                                                                                                                                                                                                                                                                                                                                                                                                                                                                                                                                                                                                                                                                                                                                                                                                                                                                                                                                                                                                                                                                                                                                                                                                                                                                                                                                                                                                                                                             |

1  
2  
3  
4  
5  
6  
7  
8  
9  
10  
11  
12  
13  
14  
15  
16  
17  
18  
19  
20  
21  
22  
23  
24  
25  
26  
27  
28  
29  
30  
31  
32  
33  
34  
35  
36  
37  
38  
39  
40  
41  
42  
43  
44  
45  
46  
47  
48  
49  
50  
51  
52  
53  
54  
55  
56  
57  
58  
59  
60

SCHOLARONE™  
Manuscripts

For peer review only

**Abstract:**

Introduction: Inspiratory muscle training (IMT) has been applied during pulmonary rehabilitation in COPD patients. However, it remains unclear if the addition of IMT to a general exercise training program leads to additional clinically relevant improvements in COPD patients. In this study, we will investigate whether the addition of IMT to a general exercise training program improves six-minute walking distance, health-related quality of life, daily physical activity, and inspiratory muscle function in COPD patients with inspiratory muscle weakness.

Methods and analysis: COPD patients (n=170) with inspiratory muscle weakness ( $P_{\text{imax}} < 60\text{cmH}_2\text{O}$  or  $< 50\%\text{pred}$ ) will be recruited to a multicentre randomised placebo controlled trial of IMT and allocated into one of the two groups. Patients in both groups will follow a three month general exercise training programme, in combination with home based IMT. The IMT will be performed with a recently developed device (POWERbreathe® KH1). This device applies an inspiratory load that is provided by an electronically controlled valve (variable flow resistive load). The intervention group (n=85) will undertake an IMT program at a high intensity ( $\geq 50\%$  of their  $P_{\text{I,max}}$ ) whereas the placebo group (n=85) will undertake IMT at a low training intensity ( $\leq 10\%$  of  $P_{\text{I,max}}$ ). Total daily IMT time for both groups will be 21 minutes (six cycles of 30 breaths). Improvement in the six-minute walking distance will be the primary outcome. Inspiratory muscle function, health-related quality of life, and daily physical activity, will be assessed as secondary outcomes.

Ethics and dissemination: Ethics approval has been obtained from relevant centre committees and the study has been registered in a publicly accessible clinical trial database. The results will be easily interpretable and should immediately be communicated to health care providers, patients and the general public. Results can be incorporated into evidence based treatment recommendations for clinical

practice.

ClinicalTrials.gov: NCT01397396

## Article summary

### Article focus

- Inspiratory muscle dysfunction occurs in patients with COPD and is associated with dyspnea and decreased exercise capacity.
- What are the additional functional and health benefits of adding home-based IMT to a general exercise training program in COPD patients with inspiratory muscle weakness?

### Key messages

- This multicentre randomised controlled trial will investigate and report on the additional improvements in exercise tolerance after adding IMT to a 3-months general exercise training program. Inspiratory muscle function, health-related quality of life, and daily physical activity, will be assessed as secondary outcomes.
- The study will focus on COPD patients with inspiratory muscle weakness defined as Pimax < 60cmH<sub>2</sub>O or < 50%pred.
- The variable flow resistive training method applies a specific training stimulus and allows full monitoring of the compliance with the home based IMT.

### Strengths and limitations of this study

- In contrast to previous studies, we designed a large, adequately powered, multi-centre randomised controlled trial to investigate the effects of IMT in COPD patients with inspiratory muscle weakness. The results from this study will help to clarify whether adjunctive IMT leads to

1  
2  
3 greater functional improvements (exercise capacity, quality of life, participation in daily activity,  
4 and symptoms) than exercise training alone.  
5  
6

- 7  
8 - The results will be focused on effects in COPD patients with inspiratory muscle weakness. The  
9 results of this study will therefore primarily be applicable in COPD patients with inspiratory  
10 muscle weakness.  
11  
12  
13

### 14 **Background**

15  
16  
17 Chronic Obstructive Pulmonary Disease (COPD) is a major cause of chronic morbidity and mortality  
18 worldwide.[1,2] COPD is characterized by persistent expiratory flow limitation that is usually  
19 progressive.[3] Dyspnea is the most prominent exercise-limiting symptom of the disease,[4] which leads  
20 to chronic avoidance of physical activities. Consequently, low physical activity levels contribute to  
21 skeletal muscle deconditioning and exercise capacity reduction, which impact negatively on health  
22 related quality of life.[5,6] Inspiratory muscle dysfunction is another extrapulmonary manifestation that  
23 is often present in patients with COPD.[7,8] It contributes to hypoxemia, hypercapnia, dyspnea and  
24 decreased exercise tolerance.[9-11] Pulmonary rehabilitation including exercise training, education,  
25 nutritional intervention, and psychosocial support is a standard care for COPD patients to counteract  
26 extrapulmonary disease manifestations.[6,12,13] Inspiratory muscle training (IMT) has also been applied  
27 frequently and is extensively studied in recent years in patients with COPD.[14] From meta-analyses of  
28 RCT's in patients with COPD it can be concluded that IMT as a standalone therapy improves  
29 inspiratory muscle function (strength and endurance), decreases symptoms of dyspnea, and improves  
30 exercise capacity.[14,15] The value of IMT as an add-on to a general exercise training program is  
31 however still under debate.[16-19] While IMT always results in significant improvements in inspiratory  
32 muscle function, its additional effects on more clinically relevant outcomes (e.g. functional exercise  
33 capacity and quality of life) are insufficiently supported by scientific evidence so far.[14] From subgroup  
34  
35  
36  
37  
38  
39  
40  
41  
42  
43  
44  
45  
46  
47  
48  
49  
50  
51  
52  
53  
54  
55  
56  
57  
58  
59  
60

1  
2  
3 analyses in the most recent meta-analysis it was concluded that significant additional effects of IMT on  
4  
5 more clinically relevant outcomes are more likely to be found in patients with inspiratory muscle  
6  
7 weakness.[12] This was previously defined as a maximal inspiratory mouth pressure ( $P_{i,max}$ ) of less than  
8  
9 60cmH<sub>2</sub>O.[14] It has therefore been recommended that future studies in patients with COPD should  
10  
11 focus specifically on patients with more pronounced inspiratory muscle weakness.[14,20] It was recently  
12  
13 shown that adjunctive IMT led to significantly greater functional improvements in a well designed  
14  
15 randomised controlled trial in patients with chronic heart failure selected for inspiratory muscle  
16  
17 weakness.[21] Comparable RCTs in patients with COPD are so far lacking.[14] We are therefore carrying  
18  
19 out a large, adequately powered, multi-centre randomised controlled trial on the effects of IMT as an  
20  
21 adjunct therapy to a general exercise training program in COPD patients with inspiratory muscle  
22  
23 weakness. Recommendations on the use of IMT as an adjunct to general exercise training in these  
24  
25 patients in international guidelines are ambiguous.[12] The outcome of this study will therefore have a  
26  
27 direct impact on clinical practice, as the results will clarify whether adjunctive IMT leads to superior  
28  
29 clinically relevant improvements for COPD patients. Functional outcomes of relevance to patients  
30  
31 (exercise capacity, quality of life, participation in daily physical activity, and symptoms) were therefore  
32  
33 chosen as main outcomes.  
34  
35  
36  
37  
38

39  
40 One of the hypotheses that links enhanced inspiratory muscle function to improvements in exercise  
41  
42 capacity is that IMT should allow the respiratory system of patients with COPD to work more  
43  
44 comfortably at high lung volumes during exercise.[22] In the present study we will use a recently  
45  
46 developed IMT device that applies a variable resistance provided by an electronically controlled valve  
47  
48 (variable flow resistive load). In contrast to the traditionally applied threshold loading, this variable flow  
49  
50 resistive load is specifically challenging the inspiratory muscles at higher lung volumes, and may lead to  
51  
52 larger training effects in COPD patients who develop dynamic hyperinflation during exercise. Besides  
53  
54 these potentially beneficial characteristics of the applied load another advantage of the device is the  
55  
56  
57  
58  
59  
60

1  
2  
3 ability to store home-based training data for up to 40 sessions. Continuous registrations of pressure and  
4  
5 flow at 500 Hz provide data on the external work of breathing and enable the verification of both  
6  
7 quantity and quality of unsupervised training sessions. The latter is of particular importance since 85% of  
8  
9 the training sessions during this RCT will be performed by patients at their homes without supervision.  
10  
11

### 12 **Aims**

13  
14 This study will examine the effects of adding a well controlled, high-intensity inspiratory muscle training  
15  
16 (IMT) program to a 3-month general exercise training program, using a large, multi-centre, randomised  
17  
18 controlled design, in COPD patients with inspiratory muscle weakness. Outcomes will be exercise  
19  
20 capacity (primary outcome), inspiratory muscle function, health-related quality of life (HRQL), and  
21  
22 participation in daily physical activity.  
23  
24  
25  
26  
27

### 28 **Hypotheses**

29  
30 We hypothesize that the addition of IMT to a general exercise training program in patients with COPD  
31  
32 and inspiratory muscle weakness will result in superior improvements exercise capacity, inspiratory  
33  
34 muscle function, health-related quality of life (HRQL), and daily physical activity, compared with  
35  
36 general exercise training alone.  
37  
38  
39

### 40 **Methods**

#### 41 **Patients**

42  
43 All patients with spirometry-proven COPD who are referred for outpatient pulmonary rehabilitation will  
44  
45 be screened for inclusion. Only patients with inspiratory muscle weakness ( $P_{i,max} < 60\text{cmH}_2\text{O}$  or  $<50\%$   
46  
47 predicted) will be eligible to participate in the study. Exclusion criteria consist of (1) diagnosed  
48  
49 psychiatric or cognitive disorders; (2) progressive neurological or neuromuscular disorders; (3) severe  
50  
51  
52  
53  
54  
55  
56  
57  
58  
59  
60

1  
2  
3 orthopedic problems having a major impact on daily activities; (4) previous inclusion in rehabilitation  
4  
5 program (<1 year).  
6  
7  
8  
9

### 10 11 12 **Study design** 13

14  
15 Patients will be informed about the study protocol prior to the start of the rehabilitation program.  
16  
17 Informed consent will be obtained at that time. Patients will be randomised into an intervention and a  
18  
19 placebo group. Group allocation will be performed by simple randomization using sealed opaque  
20  
21 envelopes in random block sizes of 4 and 6 (order unknown to investigators).[23]  
22  
23

24  
25 Both groups will follow a general exercise training program as described previously.[24] The intervention  
26  
27 group will receive an additional inspiratory muscle training program described to patients as ‘resistance  
28  
29 training’ at a high intensity ( $\geq 50\%$  PI,max), whereas the placebo group will receive an inspiratory  
30  
31 muscle training intervention described to patients as ‘endurance training’ at a low training intensity ( $\leq$   
32  
33 10% PI,max).  
34  
35

36  
37 Measurements of primary and secondary endpoints will be undertaken before and after 3 months of  
38  
39 rehabilitation. All tests will be performed by experienced investigators who are blinded to group  
40  
41 allocation. To ensure consistency between sites all assessments should be performed according to the  
42  
43 instructions agreed upon and described in the manual and the video clip, even if they may differ slightly  
44  
45 from usual local procedures.  
46  
47

48  
49 To detect a minimally clinically important difference between groups of 26m in the 6-minute walking  
50  
51 distance (6MWD),[25] assuming a standard deviation of the within group differences in the 6MWD at  
52  
53 the end of the intervention period of 60m in both groups with a degree of certainty (statistical power) of  
54  
55  
56  
57



1  
2  
3 80% and a risk for a type I error ( $\alpha$ ) < 5%, a sample size for both groups of 85 patients is needed, given  
4  
5 an anticipated dropout rate of 30%. This study will therefore be performed as a multi-centre  
6  
7 randomised controlled trial to ensure inclusion of 170 patients within a time-frame of two years. Besides  
8  
9 the lead centre at the University Hospital in Leuven, Belgium, patients will also be recruited in the  
10  
11 University Hospital Gent, Belgium; Schön Klinik Berchtesgadener Land, Germany; University Hospital  
12  
13 Nijmegen, The Netherlands; and Laval University Quebec, Canada. Each of the five centres is expected to  
14  
15 include between 30 to 40 patients within the two year inclusion period.  
16  
17  
18  
19

## 20 Interventions

### 21 22 23 **General exercise training**

24  
25 Patients in both groups will follow a three-month general exercise training program. Patients will  
26  
27 perform cycling, treadmill walking, stair climbing, arm ergometry and resistance training of both arm  
28  
29 and leg muscles.[26] Training frequency will be three sessions per week, resulting in a total of 36 training  
30  
31 sessions. Duration of the training session will increase from 40-60 minutes at the start of the program to  
32  
33 60-90 minutes after 3 months. Patients will perform endurance training or interval training at moderate  
34  
35 to high intensity (initially 60% to 70% of maximal workload). The overall training intensity will be  
36  
37 increased gradually during the course of the program using a CR10 Borg scale rating of 4 to 6 on dyspnea  
38  
39 sensation or leg effort as a means of maintaining training overload.[27] Physiotherapists providing this  
40  
41 intervention will be blinded to group allocation of patients.  
42  
43  
44  
45

### 46 47 **Inspiratory muscle training program**

48  
49 Patients will receive either high intensity inspiratory muscle training ('strength training' = intervention  
50  
51 group) or low intensity placebo IMT ('endurance training' = placebo group). Total daily training time for  
52  
53 both groups will be 21 minutes, consisting of 6 cycles of 30 breaths (two cycles, three times daily in the  
54  
55  
56  
57  
58  
59  
60

intervention group or three cycles, two times daily in the control group). There will be approximately 3.5 minutes of resistive breathing during every cycle, each followed by one minute of resting. Patients will train 7 days per week, for 12 weeks using the PowerBreathe KH1 device (POWERbreathe®KH1, HaB International Ltd., Southam, UK)). This handheld device applies a variable resistance provided by an electronically controlled valve (variable flow resistive load). Loading is maintained at the same relative

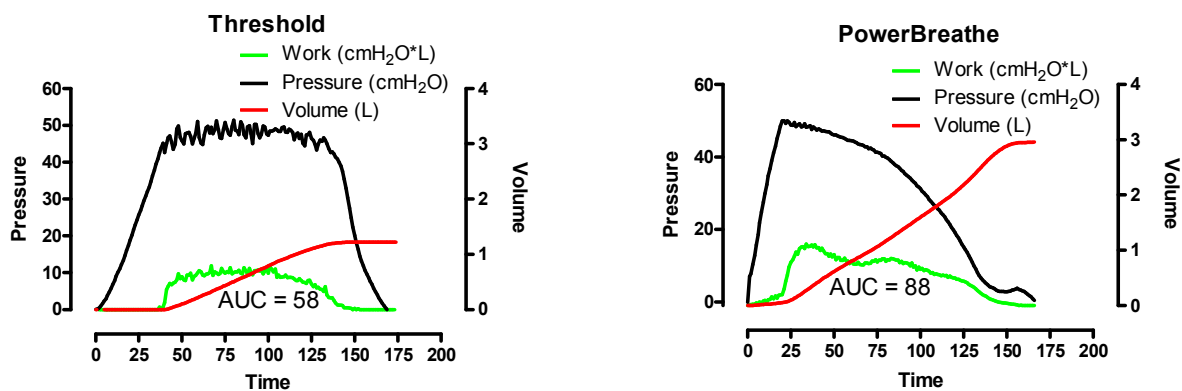

Figure 1: Comparison between constant threshold (Threshold) and variable resistive IMT (POWERbreathe® KH1). intensity

AUC = Area Under Curve

throughout the breath, by reducing the absolute load to accommodate the pressure-volume relationship of the inspiratory muscles. The application of a tapered load allows patients to get close to maximal inspiration, even at high training intensities (Figure 1).

Figure 1 illustrates a comparison of a single breath (training at an intensity of 60%  $P_{i,max}$ ) using a conventional constant threshold loading device, with that of a variable flow resistive loading device (POWERBreathe® KH1) (unpublished data). It is apparent from this figure that, in contrast to the threshold loading, the variable flow resistive load overloads the inspiratory muscles at higher lung

1  
2  
3 volumes. Since one of the hypotheses that links enhanced inspiratory muscle function to improvements  
4  
5 in exercise capacity is that IMT may allow the respiratory system of patients with COPD to work more  
6  
7 comfortably at high lung volumes during exercise,[22] we hypothesize that this variable flow resistive  
8  
9 IMT should be better suited to reduce inspiratory effort ( $P_{es}/P_{i,max}$ ) during whole body exercise.  
10  
11 Besides these hypothetically beneficial characteristics of the applied load, a further advantage of the  
12  
13 electronic loading device is the ability to store parameters of up to 40 IMT sessions. Continuous  
14  
15 registrations of pressure and flow at 500Hz provide data on the external work of breathing and enable  
16  
17 us to control both quantity and quality of unsupervised training sessions. This is of special importance  
18  
19 since 85% of the training sessions during this RCT will be performed by patients at their homes without  
20  
21 supervision. The device stores data on average mean pressure ( $cmH_2O$ ), average mean power per breath  
22  
23 (Watt), average peak flow per breath (L/s) and total work of breathing during one session of 30 breaths  
24  
25 (Joules). Patients will be instructed to perform fast and forceful inspirations and will be encouraged to  
26  
27 achieve maximal inhalation and exhalation with every breath. This breathing pattern will be supported  
28  
29 by acoustic signals from the loading device.  
30  
31  
32  
33  
34

35 The intervention group will commence training at 40% of their initial  $P_{i,max}$ . Intermediate  
36  
37 measurements of  $P_{i,max}$  will be performed every week. These  $P_{i,max}$  values will be used to calculate  
38  
39 the training load to be implemented the following week. In other words, the training load in each week  
40  
41 will be increased continuously over time by adjusting to at least 50% of the  $P_{i,max}$  value recorded in the  
42  
43 previous week. Rates of perceived inspiratory effort on a modified CR 10 Borg-Scale (4-6 out of 10) will  
44  
45 also be used to support decisions on training load increments. The control group will train at an  
46  
47 inspiratory load of 10% of their initial  $P_{i,max}$ . This training intensity will not be changed during the study  
48  
49 period. Each week, three training sessions will be performed under supervision at the outpatient clinic.  
50  
51  
52 During these supervised sessions the results of unsupervised sessions will be evaluated and patients will  
53  
54  
55  
56  
57  
58  
59  
60

1  
2  
3 receive instructions and feedback on their training efforts. Training intensity in the intervention group  
4  
5 will be adapted during these supervised sessions.  
6  
7

### 8 Outcome measures

9  
10 Table 1 provides an overview of the outcome measures at different time points in the study.  
11  
12

13  
14 **Table 1.** Outcome measurements

|                                   | Start | 3 months |
|-----------------------------------|-------|----------|
| Screen                            | X     |          |
| Informed consent                  | X     |          |
| Respiratory muscle strength       | X     | X        |
| Inspiratory muscle endurance      | X     | X        |
| Maximal exercise capacity         | X     | X        |
| Endurance exercise capacity       | X     | X        |
| Six-minute walking distance       | X     | X        |
| Daily physical activity (7 days): | X     | X        |
| Pulmonary function                | X     | X        |
| Quadriceps force                  | X     | X        |
| Handgrip force                    | X     | X        |
| CRDQ <sup>#</sup>                 | X     | X        |
| HADS <sup>*</sup>                 | X     | X        |

15  
16  
17  
18  
19  
20  
21  
22  
23  
24  
25  
26  
27  
28  
29  
30  
31  
32  
33  
34  
35  
36  
37  
38  
39  
40  
41  
42  
43  
44  
45  
46  
47 <sup>#</sup>CRDQ = Chronic Respiratory Disease Questionnaire (HRQL), <sup>\*</sup>HADS = Hospital Anxiety and Depression

48  
49 Scale

50  
51  
52 *Respiratory muscle force*  
53  
54  
55  
56  
57  
58  
59  
60

1  
2  
3 Maximal voluntary respiratory pressures will be registered at the mouth to assess respiratory muscle  
4 force. Measurements will be performed from total lung capacity for maximal expiratory pressure  
5  
6  
7  
8 (Pe,max) or residual volume for maximal inspiratory pressure (Pi,max) using the technique proposed by  
9  
10 Black and Hyatt.[28] An electronic pressure transducer will be used (MicroRPM; Micromedical, Kent,  
11  
12 UK). Assessments will be repeated at least 5 times (30 seconds recovery between attempts), and should  
13  
14 be continued until at least good reproducibility has been achieved from the three best measurements  
15  
16 (within 10 cmH<sub>2</sub>O difference among measurements). Reference values published by Rochester and Arora  
17  
18 will be used to define normal respiratory muscle force.[29]  
19  
20  
21

### 22 *Inspiratory muscle endurance*

23  
24  
25 To measure inspiratory muscle endurance patients will be asked to breathe against a submaximal  
26  
27 inspiratory load provided by the flow resistive loading device (POWERbreathe®KH1, HaB International  
28  
29 Ltd., Southam, UK) until task failure. The inspiratory load that will be selected (typically between 50-60%  
30  
31 of the Pi,max) will typically allow patients to continue breathing against the resistance for 3-7 minutes.  
32  
33 Breathing instructions for patients will be the same as during the training sessions. Number of breaths,  
34  
35 average duty cycle (inspiratory time as a fraction of the total respiratory cycle duration), average mean  
36  
37 load, average mean power, and total external inspiratory work will be recorded during the test by the  
38  
39 handheld loading device. We have recently performed a validation of the parameters that are recorded  
40  
41 during this test and found excellent agreement between the handheld loading device and  
42  
43 measurements performed with external, laboratory measurement equipment.[30] After 12 weeks of  
44  
45 IMT the endurance test will be repeated using an identical load. Improvements in endurance time and  
46  
47 breathing parameters will be recorded.  
48  
49  
50  
51  
52

### 53 *Maximal exercise capacity (incremental exercise test)*

1  
2  
3 Maximal exercise capacity will be assessed by a maximal incremental cycle exercise test (Ergometrics  
4 900, Ergoline, Bitz, Germany). After a two-minute resting period and three minutes of unloaded cycling,  
5  
6 patients will start cycling at a load of 20 Watt. Load will then be increased by 10 Watt per minute and  
7  
8 patients will cycle until symptom limitation. Oxygen uptake, carbon dioxide output and ventilation will  
9  
10 be measured breath by breath (Vmax series, SensorMedics, Anaheim, CA). Heart rate and oxygen  
11  
12 saturation will be recorded continuously. Maximal oxygen uptake will be compared with normal  
13  
14 values.[31] The perception of dyspnea and leg effort will be quantified at two-minute intervals during  
15  
16 exercise and at the end of the test using the modified Borg scale.[27] Development of dynamic  
17  
18 hyperinflation during the exercise test will be assessed by recording changes in end-expiratory lung  
19  
20 volumes. Patients will be instructed to perform maximal inspiratory maneuvers after a normal expiration  
21  
22 during resting breathing and at the end of each level of exercise. Assuming a constant total lung capacity  
23  
24 a decrease in inspiratory capacity will indicate an increase in end expiratory lung volume, which  
25  
26 indicates the degree of dynamic hyperinflation.[32] Tidal volume ( $V_T$ ), inspiratory time ( $T_I$ ), total time of  
27  
28 the respiratory cycle ( $T_{TOT}$ ) and respiratory frequency (fR) will be assessed. The  $T_I/T_{TOT}$  (duty cycle)  
29  
30 represents the proportion of the breath during which the inspiratory muscles are contracting.  
31  
32  
33  
34  
35  
36  
37  
38

#### 39 *Endurance exercise capacity (constant work rate test)*

40  
41  
42 A constant power output cycle test until symptom limitation will be performed at 80% of the maximal  
43  
44 power output (in Watts) that was reached during the initial incremental exercise test (Ergometrics 900,  
45  
46 Ergoline, Bitz, Germany). Oxygen uptake, carbon dioxide output and minute ventilation will be measured  
47  
48 breath by breath (Vmax series, SensorMedics, Anaheim, CA). Breathing pattern and dynamic  
49  
50 hyperinflation will be monitored as described previously for the incremental cardiopulmonary exercise  
51  
52 test. Heart rate and oxygen saturation will be monitored continuously. The perception of dyspnea and  
53  
54  
55  
56  
57  
58  
59  
60

1  
2  
3 leg effort will be quantified at two-minute intervals during exercise and at the end of the test using the  
4  
5 modified CR10 Borg scale.[27]  
6  
7

#### 8 9 *6-minute walking distance (6MWD)*

10  
11 Functional exercise performance will be measured using a six-minute walking test in a 50m corridor.  
12  
13 Standardized encouragement will be provided.[33] The best of two tests separated by recovery time 30  
14  
15 minutes will be used and related to reference values.[34] Oxygen saturation, heart rate and symptoms  
16  
17 of leg effort and dyspnea will be recorded before and after the test.  
18  
19

#### 20 21 22 *Physical activity monitoring*

23  
24 Measurements will be performed with an accelerometer-based activity monitor (DynaPort Minimod,  
25  
26 McRoberts BV, The Hague, The Netherlands). The Minimod is a small (64x62x13mm) and lightweight  
27  
28 device (68gram, including batteries) that contains a three-axial piezocapacitive sensor measuring at high  
29  
30 time-resolution (100Hz). Analysis of raw data allows for classification of intensity, duration and  
31  
32 frequency of movement. Different postures and walking are identified and energy expenditure is  
33  
34 estimated. The Minimod has been validated in patients with COPD.[35] Assessments will be undertaken  
35  
36 on seven consecutive days during waking hours.  
37  
38  
39

#### 40 41 42 *Pulmonary function*

43  
44 Spirometry and whole body plethysmography will be performed according to the European Respiratory  
45  
46 Society guidelines for pulmonary function testing (Vmax Autobox, Sensor Medics, Bilthoven, the  
47  
48 Netherlands).[36] Diffusing capacity for carbon monoxide will be measured by the single breath method  
49  
50 (Sensor Medics 6200, Bilthoven, the Netherlands).[37]  
51  
52

#### 53 54 55 *Peripheral muscle force*

1  
2  
3 Isometric quadriceps force will be quantified using a Cybex Norm Dynamometer (Cybex<sup>®</sup> Norm, Enraf  
4 Nonius, Delft, the Netherlands). Peak extension torque will be measured at 60° of knee flexion. At least  
5  
6 three measurements will be obtained and the highest reproducible value (within 11%) will be taken into  
7  
8 analysis. Reference values have been developed in our laboratory.[38]  
9  
10

11  
12  
13 Isometric hand grip force will be measured using a hydraulic hand grip dynamometer (Jamar Preston,  
14 Jackson, MI). Peak force will be assessed with the elbow fixed to the rib cage and flexed 90° and with the  
15  
16 wrist in neutral position. At least three measurements will be obtained and the highest reproducible  
17  
18 value will be taken into analysis and related to reference values.[26]  
19  
20  
21

### 22 *Health-related quality of life*

23  
24  
25 The Chronic Respiratory Disease Questionnaire (CRDQ) will be used to assess health-related quality of  
26  
27 life.[39] This 20-item questionnaire scores quality of life in 4 domains (dyspnea, mastery, emotional  
28  
29 functioning and fatigue) and has been validated in the Dutch, German and French language.[40-42] The  
30  
31 total score can range from 20 to 140 with higher scores indicating better quality of life.  
32  
33  
34

### 35 *Anxiety and depression*

36  
37  
38 The Hospital Anxiety and Depression Scale (HADS) will be used to assess emotional distress.[43] The  
39  
40 HADS consists of 14 items and has separate scores for anxiety (7 items) and depression (7 items). A  
41  
42 score of 11 or greater on either of the sub-scales suggests clinically significant symptoms of anxiety or  
43  
44 depression.  
45  
46  
47

## 48 **Statistical analysis**

49  
50  
51 Differences in primary and secondary outcomes between groups after 3-months of intervention will be  
52  
53 compared adjusting for baseline differences using analysis of covariance (ANCOVA).[44] Both an  
54  
55  
56



1  
2  
3 'intention-to-treat' and a 'per-protocol' analysis will be carried out to compare outcomes between  
4  
5 groups.  
6  
7

### 8 9 **Ethics and dissemination**

10  
11  
12 Ethics approval has been obtained from relevant centre committees. The results from the randomised  
13  
14 controlled trial of IMT will be submitted for publication.  
15  
16

### 17 18 **Discussion**

19  
20 This large, adequately powered, multi-centre randomised controlled trial will investigate effects of IMT  
21  
22 as an adjunct to a general exercise training program. Outcomes will be exercise capacity (primary  
23  
24 outcome), health related quality of life, and participation in daily physical activity in the selected COPD  
25  
26 patients who have pronounced inspiratory muscle weakness. The IMT in this RCT will be performed  
27  
28 using the variable flow resistive loading device described previously (POWERbreathe®KH1, HaB  
29  
30 International Ltd., Southam, UK) and validated.[30] Besides the hypothetically beneficial characteristics  
31  
32 of the applied load described above, a further advantage of this device is the ability to store training  
33  
34 parameters of up to 40 sessions. Continuous recording of pressure and flow enable us to monitor both  
35  
36 the quantity and quality of unsupervised training sessions. The latter is of special importance, since 85%  
37  
38 of IMT sessions will be undertaken by patients in their homes, without supervision.  
39  
40  
41

42  
43 We anticipate that the outcomes of this study will be of direct relevance to clinical practice. The results  
44  
45 of this study should therefore be incorporated immediately into evidence based treatment  
46  
47 recommendations for clinical practice. During the communication of these recommendations it will be  
48  
49 of special importance to stress that the results obtained in this RCT will limited to the selected group of  
50  
51 patients with COPD, i.e. those with inspiratory muscle weakness.  
52  
53  
54  
55  
56  
57  
58  
59  
60

**Funding**

None

**Competing Interests**

None

**Contributorship**

DL is the principal investigator and together with RG and NC designed and established the study. All authors are responsible for the selection of measures, recruitment and data collection. NC and DL are responsible for data analysis. All authors have read and approved the final manuscript.

**Reference List**

- 1 Mannino DM, Buist AS. Global burden of COPD: risk factors, prevalence, and future trends. *Lancet* 2007;**370**:765-73.
- 2 Rabe KF, Hurd S, Anzueto A, et al. Global strategy for the diagnosis, management, and prevention of chronic obstructive pulmonary disease: GOLD executive summary. *Am J Respir Crit Care Med* 2007;**176**:532-55.
- 3 Global Initiative for Chronic Obstructive Lung Disease (GOLD). *Global Strategy for the Diagnosis, Management and Prevention of COPD*. available at: <http://www.goldcopd.org/> . 2011. Ref Type: Internet Communication
- 4 O'Donnell DE, Travers J, Webb KA, et al. Reliability of ventilatory parameters during cycle ergometry in multicentre trials in COPD. *Eur Respir J* 2009;**34**:866-74.
- 5 Hamilton N, Killian KJ, Summers E, et al. Muscle strength, symptom intensity, and exercise capacity in patients with cardiorespiratory disorders. *Am J Respir Crit Care Med* 1995;**152**:2021-31.
- 6 Lacasse Y, Goldstein R, Lasserson TJ, et al. Pulmonary rehabilitation for chronic obstructive pulmonary disease. *Cochrane Database Syst Rev* 2006;CD003793.
- 7 Decramer M, Demedts M, Rochette F, et al. Maximal transrespiratory pressures in obstructive lung disease. *Bull Eur Physiopathol Respir* 1980;**16**:479-90.

- 1
  - 2
  - 3
  - 4
  - 5
  - 6
  - 7
  - 8
  - 9
  - 10
  - 11
  - 12
  - 13
  - 14
  - 15
  - 16
  - 17
  - 18
  - 19
  - 20
  - 21
  - 22
  - 23
  - 24
  - 25
  - 26
  - 27
  - 28
  - 29
  - 30
  - 31
  - 32
  - 33
  - 34
  - 35
  - 36
  - 37
  - 38
  - 39
  - 40
  - 41
  - 42
  - 43
  - 44
  - 45
  - 46
  - 47
  - 48
  - 49
  - 50
  - 51
  - 52
  - 53
  - 54
  - 55
  - 56
  - 57
  - 58
  - 59
  - 60
- 8 Polkey MI, Kyroussis D, Hamnegard CH, et al. Diaphragm strength in chronic obstructive pulmonary disease. *Am J Respir Crit Care Med* 1996;**154**:1310-7.
- 9 Laghi F, Tobin MJ. Disorders of the respiratory muscles. *Am J Respir Crit Care Med* 2003;**168**:10-48.
- 10 Begin P, Grassino A. Inspiratory muscle dysfunction and chronic hypercapnia in chronic obstructive pulmonary disease. *Am Rev Respir Dis* 1991;**143**:905-12.
- 11 Gosselink R, Troosters T, Decramer M. Peripheral muscle weakness contributes to exercise limitation in COPD. *Am J Respir Crit Care Med* 1996;**153**:976-80.
- 12 Nici L, Donner C, Wouters E, et al. American Thoracic Society/European Respiratory Society statement on pulmonary rehabilitation. *Am J Respir Crit Care Med* 2006;**173**:1390-413.
- 13 Ries AL, Bauldoff GS, Carlin BW, et al. Pulmonary Rehabilitation: Joint ACCP/AACVPR Evidence-Based Clinical Practice Guidelines. *Chest* 2007;**131**:4S-42S.
- 14 Gosselink R, De VJ, van den Heuvel SP, et al. Impact of inspiratory muscle training in patients with COPD: what is the evidence? *Eur Respir J* 2011;**37**:416-25.
- 15 Geddes EL, O'Brien K, Reid WD, et al. Inspiratory muscle training in adults with chronic obstructive pulmonary disease: an update of a systematic review. *Respir Med* 2008;**102**:1715-29.
- 16 Ambrosino N. The case for inspiratory muscle training in COPD. *Eur Respir J* 2011;**37**:233-5.
- 17 McConnell AK. CrossTalk opposing view: respiratory muscle training does improve exercise tolerance. *J Physiol* 2012;**590**:3397-8.
- 18 Patel MS, Hart N, Polkey MI. CrossTalk proposal: training the respiratory muscles does not improve exercise tolerance. *J Physiol* 2012;**590**:3393-5.
- 19 Polkey MI, Moxham J, Green M. The case against inspiratory muscle training in COPD. Against. *Eur Respir J* 2011;**37**:236-7.
- 20 Decramer M. Response of the respiratory muscles to rehabilitation in COPD. *J Appl Physiol* 2009;**107**:971-6.
- 21 Winkelmann ER, Chiappa GR, Lima CO, et al. Addition of inspiratory muscle training to aerobic training improves cardiorespiratory responses to exercise in patients with heart failure and inspiratory muscle weakness. *Am Heart J* 2009;**158**:768-7.
- 22 Luo YM, Hopkinson NS, Polkey MI. Tough at the top: must end-expiratory lung volume make way for end-inspiratory lung volume? *Eur Respir J* 2012;**40**:283-5.
- 23 Doig GS, Simpson F. Randomization and allocation concealment: a practical guide for researchers. *J Crit Care* 2005;**20**:187-91.

- 1  
2  
3  
4 24 Troosters T, Gosselink R, Decramer M. Short- and long-term effects of outpatient rehabilitation in  
5 patients with chronic obstructive pulmonary disease: a randomized trial. *Am J Med* 2000;**109**:207-  
6 12.  
7  
8 25 Puhan MA, Chandra D, Mosenifar Z, et al. The minimal important difference of exercise tests in  
9 severe COPD. *Eur Respir J* 2011;**37**:784-90.  
10  
11 26 Mathiowetz V, Dove M, Kashman N, et al. Grip and pinch strength: normative data for adults. *Arch*  
12 *Phys Med Rehabil* 1985;**66**:69-72.  
13  
14 27 Borg GA. Psychophysical bases of perceived exertion. *Med Sci Sports Exerc* 1982;**14**:377-81.  
15  
16 28 Black LF, Hyatt RE. Maximal respiratory pressures: normal values and relationship to age and sex.  
17 *Am Rev Respir Dis* 1969;**99**:696-702.  
18  
19 29 Rochester DF, Arora NS. Respiratory muscle failure. *Med Clin North Am* 1983;**67**:573-97.  
20  
21 30 Langer D, Jacome C, Charususin N, et al. Measurement validity of an electronic inspiratory loading  
22 device during a loaded breathing task in patients with COPD. *Respir Med* 2013;**107**:633-5.  
23  
24 31 Jones NL, Makrides L, Hitchcock C, et al. Normal standards for an incremental progressive cycle  
25 ergometer test. *Am Rev Respir Dis* 1985;**131**:700-8.  
26  
27 32 Yan S, Kaminski D, Sliwinski P. Reliability of inspiratory capacity for estimating end-expiratory lung  
28 volume changes during exercise in patients with chronic obstructive pulmonary disease. *Am J*  
29 *Respir Crit Care Med* 1997;**156**:55-9.  
30  
31 33 Guyatt GH, Pugsley SO, Sullivan MJ, et al. Effect of encouragement on walking test performance.  
32 *Thorax* 1984;**39**:818-22.  
33  
34 34 Troosters T, Gosselink R, Decramer M. Six minute walking distance in healthy elderly subjects. *Eur*  
35 *Respir J* 1999;**14**:270-4.  
36  
37 35 Langer D, Gosselink R, Sena R, et al. Validation of two activity monitors in patients with COPD.  
38 *Thorax* 2009;**64**:641-2.  
39  
40 36 Miller MR, Hankinson J, Brusasco V, et al. Standardisation of spirometry. *Eur Respir J* 2005;**26**:319-  
41 38.  
42  
43 37 MacIntyre N, Crapo RO, Viegi G, et al. Standardisation of the single-breath determination of  
44 carbon monoxide uptake in the lung. *Eur Respir J* 2005;**26**:720-35.  
45  
46 38 Decramer M. Corticosteroids contribute to muscle weakness in chronic airflow obstruction. 1994.  
47  
48 39 Guyatt GH, Berman LB, Townsend M, et al. A measure of quality of life for clinical trials in chronic  
49 lung disease. *Thorax* 1987;**42**:773-8.  
50  
51  
52  
53  
54  
55  
56  
57  
58  
59  
60

- 1  
2  
3  
4  
5  
6  
7  
8  
9  
10  
11  
12  
13  
14  
15  
16  
17  
18  
19  
20  
21  
22  
23  
24  
25  
26  
27  
28  
29  
30  
31  
32  
33  
34  
35  
36  
37  
38  
39  
40  
41  
42  
43  
44  
45  
46  
47  
48  
49  
50  
51  
52  
53  
54  
55  
56  
57  
58  
59  
60
- 40 Puhan MA, Behnke M, Frey M, et al. Self-administration and interviewer-administration of the German Chronic Respiratory Questionnaire: instrument development and assessment of validity and reliability in two randomised studies. *Health Qual Life Outcomes* 2004;**2**:1.
- 41 Bourbeau J, Maltais F, Rouleau M, et al. French-Canadian version of the Chronic Respiratory and St George's Respiratory questionnaires: an assessment of their psychometric properties in patients with chronic obstructive pulmonary disease. *Can Respir J* 2004;**11**:480-6.
- 42 Wijkstra PJ, TenVergert EM, Van AR, et al. Reliability and validity of the chronic respiratory questionnaire (CRQ). *Thorax* 1994;**49**:465-7.
- 43 Zigmond AS, Snaith RP. The hospital anxiety and depression scale. *Acta Psychiatr Scand* 1983;**67**:361-70.
- 44 Vickers AJ, Altman DG. Statistics notes: Analysing controlled trials with baseline and follow up measurements. *BMJ* 2001;**323**:1123-4.

1  
2  
3  
4  
5  
6  
7  
8  
9  
10  
11  
12  
13  
14  
15  
16  
17  
18  
19  
20  
21  
22  
23  
24  
25  
26  
27  
28  
29  
30  
31  
32  
33  
34  
35  
36  
37  
38  
39  
40  
41  
42  
43  
44  
45  
46  
47  
48  
49  
50  
51  
52  
53  
54  
55  
56  
57  
58  
59  
60

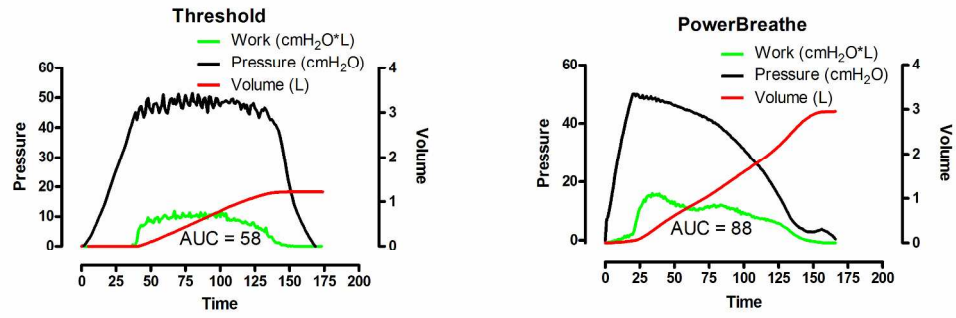

(Figure 1)  
250x91mm (300 x 300 DPI)

peer review only

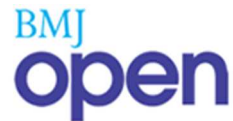

**Inspiratory muscle training protocol for patients with  
chronic obstructive pulmonary disease (IMTCO-study): a  
multicentre randomised controlled trial**

|                                 |                                                                                                                                                                                                                                                                                                                                                                                                                                                                                                                                                                                                                                                                                                                                                                                                                                                                                                                                                                                                                                                                                                                                                                                                                                                                                                                                                                                                                                                                                                                                             |
|---------------------------------|---------------------------------------------------------------------------------------------------------------------------------------------------------------------------------------------------------------------------------------------------------------------------------------------------------------------------------------------------------------------------------------------------------------------------------------------------------------------------------------------------------------------------------------------------------------------------------------------------------------------------------------------------------------------------------------------------------------------------------------------------------------------------------------------------------------------------------------------------------------------------------------------------------------------------------------------------------------------------------------------------------------------------------------------------------------------------------------------------------------------------------------------------------------------------------------------------------------------------------------------------------------------------------------------------------------------------------------------------------------------------------------------------------------------------------------------------------------------------------------------------------------------------------------------|
| Journal:                        | <i>BMJ Open</i>                                                                                                                                                                                                                                                                                                                                                                                                                                                                                                                                                                                                                                                                                                                                                                                                                                                                                                                                                                                                                                                                                                                                                                                                                                                                                                                                                                                                                                                                                                                             |
| Manuscript ID:                  | bmjopen-2013-003101.R1                                                                                                                                                                                                                                                                                                                                                                                                                                                                                                                                                                                                                                                                                                                                                                                                                                                                                                                                                                                                                                                                                                                                                                                                                                                                                                                                                                                                                                                                                                                      |
| Article Type:                   | Protocol                                                                                                                                                                                                                                                                                                                                                                                                                                                                                                                                                                                                                                                                                                                                                                                                                                                                                                                                                                                                                                                                                                                                                                                                                                                                                                                                                                                                                                                                                                                                    |
| Date Submitted by the Author:   | 05-Jul-2013                                                                                                                                                                                                                                                                                                                                                                                                                                                                                                                                                                                                                                                                                                                                                                                                                                                                                                                                                                                                                                                                                                                                                                                                                                                                                                                                                                                                                                                                                                                                 |
| Complete List of Authors:       | Charususin, Noppawan; University of Leuven, Department of Rehabilitation Sciences; Thammasat University, Department of Physical Therapy<br>Gosselink, Rik; University of Leuven, Department of Rehabilitation Sciences; UZ Gasthuisberg, Respiratory Rehabilitation and Respiratory Division<br>Decramer, Marc; UZ Gasthuisberg, Respiratory Rehabilitation and Respiratory Division<br>McConnell, Alison; Brunel University, Centre for Sports Medicine and Human Performance<br>Saey, Didier; Laval University, Centre de recherche, Institut Universitaire de cardiologie et de pneumologie de Québec<br>Maltais, Francois; Laval University, Centre de recherche, Institut Universitaire de cardiologie et de pneumologie de Québec<br>Derom, Eric; University Hospital Ghent, Department of Pulmonology<br>Vermeersch, Stefanie; University Hospital Ghent, Department of Pulmonology<br>Helvoort, Hanneke; Radboud University Nijmegen Medical Center, Department of Pulmonary Diseases<br>Heijdra, Yvonne; Radboud University Nijmegen Medical Center, Department of Pulmonary Diseases<br>Klaassen, Mariska; Radboud University Nijmegen Medical Center, Department of Pulmonary Diseases<br>Glöckl, Rainer; Schön Klinik Berchtesgaden, Department of Respiratory Medicine & Sports Therapy<br>Kenn, Klaus; Schön Klinik Berchtesgaden, Department of Respiratory Medicine & Sports Therapy<br>Langer, Daniel; University of Leuven, Rehabilitation Sciences; UZ Gasthuisberg, Respiratory Rehabilitation and Respiratory Division |
| <b>Primary Subject Heading</b>: | Respiratory medicine                                                                                                                                                                                                                                                                                                                                                                                                                                                                                                                                                                                                                                                                                                                                                                                                                                                                                                                                                                                                                                                                                                                                                                                                                                                                                                                                                                                                                                                                                                                        |
| Secondary Subject Heading:      | Rehabilitation medicine                                                                                                                                                                                                                                                                                                                                                                                                                                                                                                                                                                                                                                                                                                                                                                                                                                                                                                                                                                                                                                                                                                                                                                                                                                                                                                                                                                                                                                                                                                                     |
| Keywords:                       | Clinical trials < THERAPEUTICS, Chronic airways disease < THORACIC MEDICINE, Emphysema < THORACIC MEDICINE                                                                                                                                                                                                                                                                                                                                                                                                                                                                                                                                                                                                                                                                                                                                                                                                                                                                                                                                                                                                                                                                                                                                                                                                                                                                                                                                                                                                                                  |
|                                 |                                                                                                                                                                                                                                                                                                                                                                                                                                                                                                                                                                                                                                                                                                                                                                                                                                                                                                                                                                                                                                                                                                                                                                                                                                                                                                                                                                                                                                                                                                                                             |

1  
2  
3  
4  
5  
6  
7  
8  
9  
10  
11  
12  
13  
14  
15  
16  
17  
18  
19  
20  
21  
22  
23  
24  
25  
26  
27  
28  
29  
30  
31  
32  
33  
34  
35  
36  
37  
38  
39  
40  
41  
42  
43  
44  
45  
46  
47  
48  
49  
50  
51  
52  
53  
54  
55  
56  
57  
58  
59  
60

SCHOLARONE™  
Manuscripts

For peer review only



## Article summary

### Article focus

- Inspiratory muscle dysfunction occurs in patients with COPD and is associated with dyspnea and decreased exercise capacity.
- What are the additional functional and health benefits of adding home-based IMT to a general exercise training program in COPD patients with inspiratory muscle weakness?

### Key messages

- This multicentre randomised controlled trial will investigate and report on the additional improvements in exercise tolerance after adding IMT to a 3-months general exercise training program. Inspiratory muscle function, health-related quality of life, and daily physical activity, will be assessed as secondary outcomes.
- The study will focus on COPD patients with inspiratory muscle weakness defined as Pimax < 60cmH<sub>2</sub>O or < 50%pred.
- The variable flow resistive training method applies a specific training stimulus and allows full monitoring of the compliance with the home based IMT.

### Strengths and limitations of this study

- In contrast to previous studies, we designed a large, adequately powered, multi-centre randomised controlled trial to investigate the effects of IMT in COPD patients with inspiratory muscle weakness. The results from this study will help to clarify whether adjunctive IMT leads to greater functional improvements (exercise capacity, quality of life, participation in daily activity, and symptoms) than exercise training alone.

- 1  
2  
3 - The results will be focused on effects in COPD patients with inspiratory muscle weakness. The  
4 results of this study will therefore primarily be applicable in COPD patients with inspiratory  
5 muscle weakness.  
6  
7  
8  
9

### 10 **Background**

11  
12 Chronic Obstructive Pulmonary Disease (COPD) is a major cause of chronic morbidity and mortality  
13 worldwide.[1,2] COPD is characterized by persistent expiratory flow limitation that is usually  
14 progressive.[3] Dyspnea is the most prominent exercise-limiting symptom of the disease,[4] which leads  
15 to chronic avoidance of physical activities. Consequently, low physical activity levels contribute to  
16 skeletal muscle deconditioning and exercise capacity reduction, which impact negatively on health  
17 related quality of life.[5,6] Inspiratory muscle dysfunction is another extrapulmonary manifestation that  
18 is often present in patients with COPD.[7,8] It contributes to hypoxemia, hypercapnia, dyspnea and  
19 decreased exercise tolerance.[9-11] Pulmonary rehabilitation including exercise training, education,  
20 nutritional intervention, and psychosocial support is a standard care for COPD patients to counteract  
21 extrapulmonary disease manifestations.[6,12,13] Inspiratory muscle training (IMT) has also been applied  
22 frequently and is extensively studied in recent years in patients with COPD.[14] From meta-analyses of  
23 RCT's in patients with COPD it can be concluded that IMT as a standalone therapy improves  
24 inspiratory muscle function (strength and endurance), decreases symptoms of dyspnea, and improves  
25 exercise capacity.[14,15] The value of IMT as an add-on to a general exercise training program is  
26 however still under debate.[16-19] While IMT always results in significant improvements in inspiratory  
27 muscle function, its additional effects on more clinically relevant outcomes (e.g. functional exercise  
28 capacity and quality of life) are insufficiently supported by scientific evidence so far.[14] From subgroup  
29 analyses in the most recent meta-analysis it was concluded that significant additional effects of IMT on  
30 more clinically relevant outcomes are more likely to be found in patients with inspiratory muscle  
31  
32  
33  
34  
35  
36  
37  
38  
39  
40  
41  
42  
43  
44  
45  
46  
47  
48  
49  
50  
51  
52  
53  
54  
55  
56  
57  
58  
59  
60

1  
2  
3 weakness.[12] This was previously defined as a maximal inspiratory mouth pressure ( $P_{i,max}$ ) of less than  
4  
5 60cmH<sub>2</sub>O.[14] It has therefore been recommended that future studies in patients with COPD should  
6  
7 focus specifically on patients with more pronounced inspiratory muscle weakness.[14,20] It was recently  
8  
9 shown that adjunctive IMT led to significantly greater functional improvements in a well designed  
10  
11 randomised controlled trial in patients with chronic heart failure selected for inspiratory muscle  
12  
13 weakness.[21] Comparable RCTs in patients with COPD are so far lacking.[14] We are therefore carrying  
14  
15 out a large, adequately powered, multi-centre randomised controlled trial on the effects of IMT as an  
16  
17 adjunct therapy to a general exercise training program in COPD patients with inspiratory muscle  
18  
19 weakness. Recommendations on the use of IMT as an adjunct to general exercise training in these  
20  
21 patients in international guidelines are ambiguous.[12] The outcome of this study will therefore have a  
22  
23 direct impact on clinical practice, as the results will clarify whether adjunctive IMT leads to superior  
24  
25 clinically relevant improvements for COPD patients. Functional outcomes of relevance to patients  
26  
27 (exercise capacity, quality of life, participation in daily physical activity, and symptoms) were therefore  
28  
29 chosen as main outcomes.  
30  
31  
32  
33  
34

35 One of the hypotheses that links enhanced inspiratory muscle function to improvements in exercise  
36  
37 capacity is that IMT should allow the respiratory system of patients with COPD to work more  
38  
39 comfortably at high lung volumes during exercise.[22] In the present study we will use a recently  
40  
41 developed IMT device that applies a variable resistance provided by an electronically controlled valve  
42  
43 (variable flow resistive load). In contrast to the traditionally applied threshold loading, this variable flow  
44  
45 resistive load is specifically challenging the inspiratory muscles at higher lung volumes, and may lead to  
46  
47 larger training effects in COPD patients who develop dynamic hyperinflation during exercise. Besides  
48  
49 these potentially beneficial characteristics of the applied load another advantage of the device is the  
50  
51 ability to store home-based training data for up to 40 sessions. Continuous registrations of pressure and  
52  
53 flow at 500 Hz provide data on the external work of breathing and enable the verification of both  
54  
55  
56  
57  
58  
59  
60

1  
2  
3 quantity and quality of unsupervised training sessions. The latter is of particular importance since 85% of  
4  
5 the training sessions during this RCT will be performed by patients at their homes without supervision.  
6  
7

### 8 **Aims**

9  
10 This study will examine the effects of adding a well-controlled, high-intensity inspiratory muscle training  
11  
12 (IMT) program to a 3-month general exercise training program, using a large, multi-centre, randomised  
13  
14 controlled design, in COPD patients with inspiratory muscle weakness. Outcomes will be exercise  
15  
16 capacity (primary outcome), inspiratory muscle function, health-related quality of life (HRQL), and  
17  
18 participation in daily physical activity.  
19  
20  
21

### 22 **Hypotheses**

23  
24 We hypothesize that the addition of IMT to a general exercise training program in patients with COPD  
25  
26 and inspiratory muscle weakness will result in superior improvements exercise capacity, inspiratory  
27  
28 muscle function, health-related quality of life (HRQL), and daily physical activity, compared with  
29  
30 general exercise training alone.  
31  
32  
33  
34

### 35 **Methods**

#### 36 **Patients**

37  
38 All patients with spirometry-proven COPD who are referred for outpatient pulmonary rehabilitation will  
39  
40 be screened for inclusion. Only patients with inspiratory muscle weakness ( $P_{i,max} < 60\text{cmH}_2\text{O}$  or  $<50\%$   
41  
42 predicted) will be eligible to participate in the study. Exclusion criteria consist of (1) diagnosed  
43  
44 psychiatric or cognitive disorders; (2) progressive neurological or neuromuscular disorders; (3) severe  
45  
46 orthopedic problems having a major impact on daily activities; (4) previous inclusion in rehabilitation  
47  
48 program ( $<1$  year).  
49  
50  
51  
52  
53  
54  
55  
56  
57  
58  
59  
60

## Study design

Patients will be informed about the study protocol prior to the start of the rehabilitation program. Informed consent will be obtained at that time. Patients will be randomised into an intervention and a placebo group. Group allocation will be performed by simple randomization using sealed opaque envelopes in random block sizes of 4 and 6 (order unknown to investigators).[23]

Both groups will follow a general exercise training program as described previously.[24] The intervention group will receive an additional inspiratory muscle training program described to patients as 'resistance training' at a high intensity ( $\geq 50\%$  PI,max), whereas the placebo group will receive an inspiratory muscle training intervention described to patients as 'endurance training' at a low training intensity ( $\leq 10\%$  PI,max).

Measurements of primary and secondary endpoints will be undertaken before and after 3 months of rehabilitation. All tests will be performed by experienced investigators who are blinded to group allocation. To ensure consistency between centres all assessments should be performed according to the instructions agreed upon and described in a manual of procedures and an instructional video, even if they may differ slightly from usual local procedures. To further improve the consistency, the five centres will regularly receive a newsletter to update them on the progress of the study and to share eventual technical problems between centers. Staff from all participating centres will be able to contact the coordinating center in Leuven by e-mail or telephone in case they should have any questions concerning the study.

To detect a minimally clinically important difference between groups of 26m in the 6-minute walking distance (6MWD),[25] assuming a standard deviation of the within group differences in the 6MWD at the end of the intervention period of 60m in both groups with a degree of certainty (statistical power) of

1  
2  
3 80% and a risk for a type I error ( $\alpha$ ) < 5%, a sample size for both groups of 85 patients is needed, given  
4  
5 an anticipated dropout rate of 30%. This study will therefore be performed as a multi-centre  
6  
7 randomised controlled trial to ensure inclusion of 170 patients within a time-frame of two years. Besides  
8  
9 the lead centre at the University Hospital in Leuven, Belgium, patients will also be recruited in the  
10  
11 University Hospital Gent, Belgium; Schön Klinik Berchtesgadener Land, Germany; University Hospital  
12  
13 Nijmegen, The Netherlands; and Laval University Quebec, Canada. Each of the five centres is expected to  
14  
15 include between 30 to 40 patients within the two year inclusion period.  
16  
17

18  
19  
20 In accordance with the Belgian law relating to experiments in humans dated May 7, 2004, KU/UZ Leuven  
21  
22 shall assume, even without fault, the responsibility of any damages incurred by a Subject and linked  
23  
24 directly or indirectly to the participation to the Study, and shall provide compensation therefore through  
25  
26 its insurance program. All collaborating sites shall have and maintain in full force and effect during the  
27  
28 term of this Agreement (and following termination of the Study to cover any claims arising from the  
29  
30 Study) adequate insurance coverage for: (i) medical professional and/or medical malpractice liability,  
31  
32 and (ii) general liability, and (iii) other possible damages resulting from the Study at the Institution  
33  
34 required by local law, each such insurance coverage in amounts appropriate to the conduct of the  
35  
36 services of the Participating Site under this Agreement.  
37  
38  
39  
40

## 41 Interventions

### 42 General exercise training

43  
44 Patients in both groups will follow a three-month general exercise training program. Patients will  
45  
46 perform cycling, treadmill walking, stair climbing, arm ergometry and resistance training of both arm  
47  
48 and leg muscles.[26] Training frequency will be three sessions per week, resulting in a total of 36 training  
49  
50 sessions. Duration of the training session will increase from 40-60 minutes at the start of the program to  
51  
52 60-90 minutes after 3 months. Patients will perform endurance training or interval training at moderate  
53  
54  
55  
56  
57  
58  
59  
60

1  
2  
3 to high intensity (initially 60% to 70% of maximal workload). The overall training intensity will be  
4  
5 increased gradually during the course of the program using a CR10 Borg scale rating of 4 to 6 on dyspnea  
6  
7 sensation or leg effort as a means of maintaining training overload.[27] Physiotherapists providing this  
8  
9 intervention will be blinded to group allocation of patients.  
10  
11

### 12 13 **Inspiratory muscle training program**

14  
15  
16 Patients will receive either high intensity inspiratory muscle training ('strength training' = intervention  
17  
18 group) or low intensity placebo IMT ('endurance training' = placebo group). The training load in this  
19  
20 study will be adjusted according to data from a previously performed pilot study about a home-based,  
21  
22 high intensity IMT programs in COPD patients with inspiratory muscle weakness.[28] Total daily training  
23  
24 time for both groups will be 21 minutes, consisting of 6 cycles of 30 breaths (two cycles, three times  
25  
26 daily in the intervention group or three cycles, two times daily in the control group). There will be  
27  
28 approximately 3.5 minutes of resistive breathing during every cycle, each followed by one minute of  
29  
30 resting. Patients will train 7 days per week, for 12 weeks using the PowerBreathe KH1 device  
31  
32 (POWERbreathe®KH1, HaB International Ltd., Southam, UK). This handheld device applies a variable  
33  
34 resistance provided by an electronically controlled valve (variable flow resistive load). Loading is  
35  
36 maintained at the same relative intensity throughout the breath, by reducing the absolute load to  
37  
38 accommodate the pressure-volume relationship of the inspiratory muscles. The application of a tapered  
39  
40 load allows patients to get close to maximal inspiration, even at high training intensities (Figure 1).  
41  
42  
43  
44  
45  
46  
47  
48  
49  
50  
51  
52  
53  
54  
55  
56  
57  
58  
59  
60

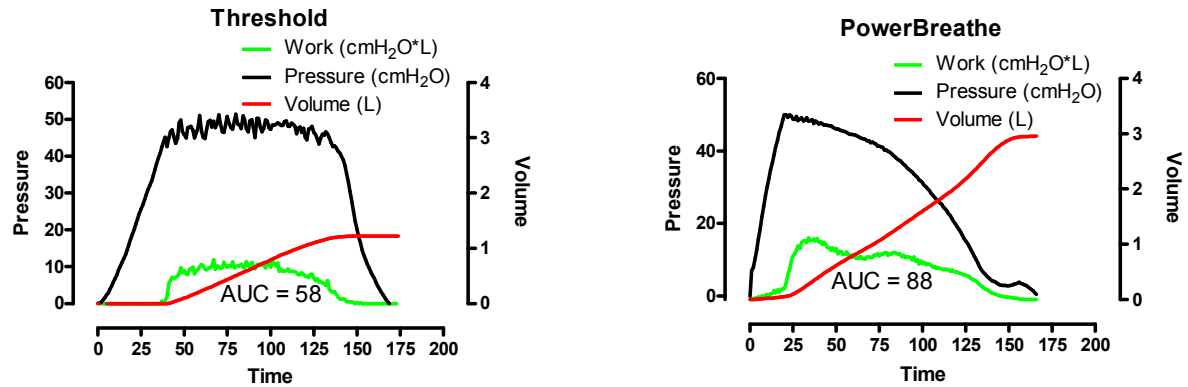

Figure 1: Comparison between constant threshold (Threshold) and variable resistive IMT (POWERbreathe® KH1).

AUC = Area Under Curve

Figure 1 illustrates a comparison of a single breath (training at an intensity of 60%  $P_{i,max}$ ) using a conventional constant threshold loading device, with that of a variable flow resistive loading device (POWERBreathe® KH1).[28] It is apparent from this figure that, in contrast to the threshold loading, the variable flow resistive load overloads the inspiratory muscles at higher lung volumes. Since one of the hypotheses that links enhanced inspiratory muscle function to improvements in exercise capacity is that IMT may allow the respiratory system of patients with COPD to work more comfortably at high lung volumes during exercise,[22] we hypothesize that this variable flow resistive IMT should be better suited to reduce inspiratory effort ( $P_{es}/P_{i,max}$ ) during whole body exercise. Besides these hypothetically beneficial characteristics of the applied load, a further advantage of the electronic leading device is the ability to store parameters of up to 40 IMT sessions. Continuous registrations of pressure and flow at 500Hz provide data on the external work of breathing and enable us to control both quantity and quality of unsupervised training sessions. This is of special importance since 85% of the training sessions during this RCT will be performed by patients at their homes without supervision. The device stores data on average mean pressure (cmH<sub>2</sub>O), average mean power per breath (Watt), average peak flow per breath (L/s) and total work of breathing during one session of 30 breaths (Joules). Patients will be instructed to



1  
2  
3 perform fast and forceful inspirations and will be encouraged to achieve maximal inhalation and  
4 exhalation with every breath. This breathing pattern will be supported by acoustic signals from the  
5 loading device.  
6  
7  
8  
9

10 The intervention group will commence training at 40% of their initial  $P_{i,max}$ . Intermediate  
11 measurements of  $P_{i,max}$  will be performed every week. These  $P_{i,max}$  values will be used to calculate  
12 the training load to be implemented the following week. In other words, the training load in each week  
13 will be increased continuously over time by adjusting to at least 50% of the  $P_{i,max}$  value recorded in the  
14 previous week. Rates of perceived inspiratory effort on a modified CR 10 Borg-Scale (4-6 out of 10) will  
15 also be used to support decisions on training load increments. The control group will train at an  
16 inspiratory load of 10% of their initial  $P_{i,max}$ . This training intensity will not be changed during the study  
17 period. Each week, three training sessions will be performed under supervision at the outpatient clinic.  
18 During these supervised sessions the results of unsupervised sessions will be evaluated and patients will  
19 receive instructions and feedback on their training efforts. Resting periods will be given as needed as  
20 long as patients are able to complete the full volume of training that is prescribed. Training intensity in  
21 the intervention group will be adapted during these supervised sessions.  
22  
23  
24  
25  
26  
27  
28  
29  
30  
31  
32  
33  
34  
35  
36

37 When patients experience acute exacerbations or respiratory infections, they will temporarily interrupt  
38 their participation in the rehabilitation and IMT program. Based on guidance from the treating  
39 pulmonologist they will however return to the program as quickly as possible. Periods of infections,  
40 exacerbations, and hospitalizations will be registered and their stay in the program will be prolonged in  
41 order to complete 12 weeks of IMT training program.  
42  
43  
44  
45  
46  
47  
48

### 49 Outcome measures

50  
51  
52 Table 1 provides an overview of the outcome measures at different time points in the study.  
53  
54

55 **Table 1.** Outcome measurements  
56  
57  
58  
59  
60

|                                   | Start | 3 months |
|-----------------------------------|-------|----------|
| Screen                            | X     |          |
| Informed consent                  | X     |          |
| Respiratory muscle strength       | X     | X        |
| Inspiratory muscle endurance      | X     | X        |
| Maximal exercise capacity         | X     | X        |
| Endurance exercise capacity       | X     | X        |
| Six-minute walking distance       | X     | X        |
| Daily physical activity (7 days): | X     | X        |
| Pulmonary function                | X     | X        |
| Quadriceps force                  | X     | X        |
| Handgrip force                    | X     | X        |
| CRDQ <sup>#</sup>                 | X     | X        |
| HADS <sup>*</sup>                 | X     | X        |

<sup>#</sup>CRDQ = Chronic Respiratory Disease Questionnaire (HRQL), <sup>\*</sup>HADS = Hospital Anxiety and Depression

Scale

*Respiratory muscle force*

Maximal voluntary respiratory pressures will be registered at the mouth to assess respiratory muscle force. Measurements will be performed from total lung capacity for maximal expiratory pressure ( $P_{e,max}$ ) or residual volume for maximal inspiratory pressure ( $P_{i,max}$ ) using the technique proposed by Black and Hyatt.[29] An electronic pressure transducer will be used (MicroRPM; Micromedical, Kent, UK). Assessments will be repeated at least 5 times (30 seconds recovery between attempts), and should be continued until at least good reproducibility has been achieved from the three best measurements

1  
2  
3 (within 10 cmH<sub>2</sub>O difference among measurements). Reference values published by Rochester and Arora  
4  
5 will be used to define normal respiratory muscle force.[30]  
6  
7

#### 8 9 *Inspiratory muscle endurance*

10  
11 To measure inspiratory muscle endurance patients will be asked to breathe against a submaximal  
12  
13 inspiratory load provided by the flow resistive loading device (POWERbreathe®KH1, HaB International  
14  
15 Ltd., Southam, UK) until task failure. The inspiratory load that will be selected (typically between 50-60%  
16  
17 of the Pi,max) will typically allow patients to continue breathing against the resistance for 3-7 minutes.  
18  
19 Breathing instructions for patients will be the same as during the training sessions. Number of breaths,  
20  
21 average duty cycle (inspiratory time as a fraction of the total respiratory cycle duration), average mean  
22  
23 load, average mean power, and total external inspiratory work will be recorded during the test by the  
24  
25 handheld loading device. We have recently performed a validation of the parameters that are recorded  
26  
27 during this test and found excellent agreement between the handheld loading device and  
28  
29 measurements performed with external, laboratory measurement equipment.[31] After 12 weeks of  
30  
31 IMT the endurance test will be repeated using an identical load. Improvements in endurance time and  
32  
33 breathing parameters will be recorded.  
34  
35  
36  
37  
38

#### 39 40 *Maximal exercise capacity (incremental exercise test)*

41  
42  
43 Maximal exercise capacity will be assessed by a maximal incremental cycle exercise test (Ergometrics  
44  
45 900, Ergoline, Bitz, Germany). After a two-minute resting period and three minutes of unloaded cycling,  
46  
47 patients will start cycling at a load of 20 Watt. Load will then be increased by 10 Watt per minute and  
48  
49 patients will cycle until symptom limitation. Oxygen uptake, carbon dioxide output and ventilation will  
50  
51 be measured breath by breath (Vmax series, SensorMedics, Anaheim, CA). Heart rate and oxygen  
52  
53 saturation will be recorded continuously. Maximal oxygen uptake will be compared with normal  
54  
55  
56  
57  
58  
59  
60

1  
2  
3 values.[32] The perception of dyspnea and leg effort will be quantified at two-minute intervals during  
4  
5 exercise and at the end of the test using the modified Borg scale.[27] Development of dynamic  
6  
7 hyperinflation during the exercise test will be assessed by recording changes in end-expiratory lung  
8  
9 volumes. Patients will be instructed to perform maximal inspiratory maneuvers after a normal expiration  
10  
11 during resting breathing and at the end of each level of exercise. Assuming a constant total lung capacity  
12  
13 a decrease in inspiratory capacity will indicate an increase in end expiratory lung volume, which  
14  
15 indicates the degree of dynamic hyperinflation.[33] Tidal volume ( $V_T$ ), inspiratory time ( $T_I$ ), total time of  
16  
17 the respiratory cycle ( $T_{TOT}$ ) and respiratory frequency (fR) will be assessed. The  $T_I/T_{TOT}$  (duty cycle)  
18  
19 represents the proportion of the breath during which the inspiratory muscles are contracting.  
20  
21  
22  
23

#### 24 25 *Endurance exercise capacity (constant work rate test)*

26  
27

28 A constant power output cycle test until symptom limitation will be performed at 80% of the maximal  
29  
30 power output (in Watts) that was reached during the initial incremental exercise test (Ergometrics 900,  
31  
32 Ergoline, Bitz, Germany). Oxygen uptake, carbon dioxide output and minute ventilation will be measured  
33  
34 breath by breath (Vmax series, SensorMedics, Anaheim, CA). Breathing pattern and dynamic  
35  
36 hyperinflation will be monitored as described previously for the incremental cardiopulmonary exercise  
37  
38 test. Heart rate and oxygen saturation will be monitored continuously. The perception of dyspnea and  
39  
40 leg effort will be quantified at two-minute intervals during exercise and at the end of the test using the  
41  
42 modified CR10 Borg scale.[27]  
43  
44  
45

#### 46 47 *6-minute walking distance (6MWD)*

48  
49

50 Functional exercise performance will be measured using a six-minute walking test in a 50m corridor.  
51  
52 Standardized encouragement will be provided.[34] The best of two tests separated by recovery time 30  
53  
54  
55  
56  
57  
58  
59  
60

1  
2  
3 minutes will be used and related to reference values.[35] Oxygen saturation, heart rate and symptoms  
4  
5 of leg effort and dyspnea will be recorded before and after the test.  
6  
7

#### 8 9 *Physical activity monitoring*

10  
11 Measurements will be performed with an accelerometer-based activity monitor (DynaPort Minimod,  
12  
13 McRoberts BV, The Hague, The Netherlands). The Minimod is a small (64x62x13mm) and lightweight  
14  
15 device (68gram, including batteries) that contains a three-axial piezocapacitive sensor measuring at high  
16  
17 time-resolution (100Hz). Analysis of raw data allows for classification of intensity, duration and  
18  
19 frequency of movement. Different postures and walking are identified and energy expenditure is  
20  
21 estimated. The Minimod has been validated in patients with COPD.[36] Assessments will be undertaken  
22  
23 on seven consecutive days during waking hours.  
24  
25  
26  
27

#### 28 29 *Pulmonary function*

30  
31 Spirometry and whole body plethysmography will be performed according to the European Respiratory  
32  
33 Society guidelines for pulmonary function testing (Vmax Autobox, Sensor Medics, Bilthoven, the  
34  
35 Netherlands).[37] Diffusing capacity for carbon monoxide will be measured by the single breath method  
36  
37 (Sensor Medics 6200, Bilthoven, the Netherlands).[38]  
38  
39  
40  
41

#### 42 43 *Peripheral muscle force*

44  
45 Isometric quadriceps force will be quantified using a Cybex Norm Dynamometer (Cybex<sup>®</sup> Norm, Enraf  
46  
47 Nonius, Delft, the Netherlands). Peak extension torque will be measured at 60° of knee flexion. At least  
48  
49 three measurements will be obtained and the highest reproducible value (within 11%) will be taken into  
50  
51 analysis. Reference values have been developed in our laboratory.[39]  
52  
53  
54  
55  
56  
57  
58  
59  
60

1  
2  
3 Isometric hand grip force will be measured using a hydraulic hand grip dynamometer (Jamar Preston,  
4 Jackson, MI). Peak force will be assessed with the elbow fixed to the rib cage and flexed 90° and with the  
5 wrist in neutral position. At least three measurements will be obtained and the highest reproducible  
6 value will be taken into analysis and related to reference values.[26]  
7  
8  
9

### 10 11 12 *Health-related quality of life*

13  
14  
15 The Chronic Respiratory Disease Questionnaire (CRDQ) will be used to assess health-related quality of  
16 life.[40] This 20-item questionnaire scores quality of life in 4 domains (dyspnea, mastery, emotional  
17 functioning and fatigue) and has been validated in the Dutch, German and French language.[41-43] The  
18 total score can range from 20 to 140 with higher scores indicating better quality of life.  
19  
20  
21  
22  
23  
24

### 25 26 27 *Anxiety and depression*

28  
29 The Hospital Anxiety and Depression Scale (HADS) will be used to assess emotional distress.[44] The  
30 HADS consists of 14 items and has separate scores for anxiety (7 items) and depression (7 items). A  
31 score of 11 or greater on either of the sub-scales suggests clinically significant symptoms of anxiety or  
32 depression.  
33  
34  
35  
36  
37  
38  
39

## 40 41 **Statistical analysis**

42 Differences in primary and secondary outcomes between groups after 3-months of intervention will be  
43 compared adjusting for baseline differences using analysis of covariance (ANCOVA).[45] Both an  
44 'intention-to-treat' and a 'per-protocol' analysis will be carried out to compare outcomes between  
45 groups.  
46  
47  
48  
49  
50  
51

## 52 53 **Ethics and dissemination**

1  
2  
3 Ethics approval has been obtained from relevant centre committees. The results from the randomised  
4  
5 controlled trial of IMT will be submitted for publication.  
6  
7

## 8 9 Discussion

10  
11 This large, adequately powered, multi-centre randomised controlled trial will investigate effects of IMT  
12  
13 as an adjunct to a general exercise training program. Outcomes will be exercise capacity (primary  
14  
15 outcome), health related quality of life, and participation in daily physical activity in the selected COPD  
16  
17 patients who have pronounced inspiratory muscle weakness. The IMT in this RCT will be performed  
18  
19 using the variable flow resistive loading device described previously (POWERbreathe®KH1, HaB  
20  
21 International Ltd., Southam, UK) and validated.[31] Besides the hypothetically beneficial characteristics  
22  
23 of the applied load described above, a further advantage of this device is the ability to store training  
24  
25 parameters of up to 40 sessions. Continuous recording of pressure and flow enable us to monitor both  
26  
27 the quantity and quality of unsupervised training sessions. The latter is of special importance, since 85%  
28  
29 of IMT sessions will be undertaken by patients in their homes, without supervision.  
30  
31

32  
33 We anticipate that the outcomes of this study will be of direct relevance to clinical practice. The results  
34  
35 of this study should therefore be incorporated immediately into evidence based treatment  
36  
37 recommendations for clinical practice. During the communication of these recommendations it will be  
38  
39 of special importance to stress that the results obtained in this RCT will limited to the selected group of  
40  
41 patients with COPD, i.e. those with inspiratory muscle weakness.  
42  
43  
44  
45  
46  
47

## 48 Reference List

- 49  
50  
51  
52 1 Mannino DM, Buist AS. Global burden of COPD: risk factors, prevalence, and future trends. *Lancet*  
53 2007;**370**:765-73.  
54  
55  
56  
57

- 1
  - 2
  - 3
  - 4
  - 5
  - 6
  - 7
  - 8
  - 9
  - 10
  - 11
  - 12
  - 13
  - 14
  - 15
  - 16
  - 17
  - 18
  - 19
  - 20
  - 21
  - 22
  - 23
  - 24
  - 25
  - 26
  - 27
  - 28
  - 29
  - 30
  - 31
  - 32
  - 33
  - 34
  - 35
  - 36
  - 37
  - 38
  - 39
  - 40
  - 41
  - 42
  - 43
  - 44
  - 45
  - 46
  - 47
  - 48
  - 49
  - 50
  - 51
  - 52
  - 53
  - 54
  - 55
  - 56
  - 57
  - 58
  - 59
  - 60
- 2 Rabe KF, Hurd S, Anzueto A, et al. Global strategy for the diagnosis, management, and prevention of chronic obstructive pulmonary disease: GOLD executive summary. *Am J Respir Crit Care Med* 2007;**176**:532-55.
- 3 Global Initiative for Chronic Obstructive Lung Disease (GOLD). *Global Strategy for the Diagnosis, Management and Prevention of COPD*. available at: <http://www.goldcopd.org/> . 2011.  
Ref Type: Internet Communication
- 4 O'Donnell DE, Travers J, Webb KA, et al. Reliability of ventilatory parameters during cycle ergometry in multicentre trials in COPD. *Eur Respir J* 2009;**34**:866-74.
- 5 Hamilton N, Killian KJ, Summers E, et al. Muscle strength, symptom intensity, and exercise capacity in patients with cardiorespiratory disorders. *Am J Respir Crit Care Med* 1995;**152**:2021-31.
- 6 Lacasse Y, Goldstein R, Lasserson TJ, et al. Pulmonary rehabilitation for chronic obstructive pulmonary disease. *Cochrane Database Syst Rev* 2006;CD003793.
- 7 Decramer M, Demedts M, Rochette F, et al. Maximal transrespiratory pressures in obstructive lung disease. *Bull Eur Physiopathol Respir* 1980;**16**:479-90.
- 8 Polkey MI, Kyroussis D, Hamnegard CH, et al. Diaphragm strength in chronic obstructive pulmonary disease. *Am J Respir Crit Care Med* 1996;**154**:1310-7.
- 9 Laghi F, Tobin MJ. Disorders of the respiratory muscles. *Am J Respir Crit Care Med* 2003;**168**:10-48.
- 10 Begin P, Grassino A. Inspiratory muscle dysfunction and chronic hypercapnia in chronic obstructive pulmonary disease. *Am Rev Respir Dis* 1991;**143**:905-12.
- 11 Gosselink R, Troosters T, Decramer M. Peripheral muscle weakness contributes to exercise limitation in COPD. *Am J Respir Crit Care Med* 1996;**153**:976-80.
- 12 Nici L, Donner C, Wouters E, et al. American Thoracic Society/European Respiratory Society statement on pulmonary rehabilitation. *Am J Respir Crit Care Med* 2006;**173**:1390-413.
- 13 Ries AL, Bauldoff GS, Carlin BW, et al. Pulmonary Rehabilitation: Joint ACCP/AACVPR Evidence-Based Clinical Practice Guidelines. *Chest* 2007;**131**:4S-42S.
- 14 Gosselink R, De VJ, van den Heuvel SP, et al. Impact of inspiratory muscle training in patients with COPD: what is the evidence? *Eur Respir J* 2011;**37**:416-25.
- 15 Geddes EL, O'Brien K, Reid WD, et al. Inspiratory muscle training in adults with chronic obstructive pulmonary disease: an update of a systematic review. *Respir Med* 2008;**102**:1715-29.
- 16 Ambrosino N. The case for inspiratory muscle training in COPD. *Eur Respir J* 2011;**37**:233-5.
- 17 McConnell AK. CrossTalk opposing view: respiratory muscle training does improve exercise tolerance. *J Physiol* 2012;**590**:3397-8.



- 1  
2  
3  
4  
5  
6  
7  
8  
9  
10  
11  
12  
13  
14  
15  
16  
17  
18  
19  
20  
21  
22  
23  
24  
25  
26  
27  
28  
29  
30  
31  
32  
33  
34  
35  
36  
37  
38  
39  
40  
41  
42  
43  
44  
45  
46  
47  
48  
49  
50  
51  
52  
53  
54  
55  
56  
57  
58  
59  
60
- 18 Patel MS, Hart N, Polkey MI. CrossTalk proposal: training the respiratory muscles does not improve exercise tolerance. *J Physiol* 2012;**590**:3393-5.
- 19 Polkey MI, Moxham J, Green M. The case against inspiratory muscle training in COPD. *Against. Eur Respir J* 2011;**37**:236-7.
- 20 Decramer M. Response of the respiratory muscles to rehabilitation in COPD. *J Appl Physiol* 2009;**107**:971-6.
- 21 Winkelmann ER, Chiappa GR, Lima CO, et al. Addition of inspiratory muscle training to aerobic training improves cardiorespiratory responses to exercise in patients with heart failure and inspiratory muscle weakness. *Am Heart J* 2009;**158**:768-7.
- 22 Luo YM, Hopkinson NS, Polkey MI. Tough at the top: must end-expiratory lung volume make way for end-inspiratory lung volume? *Eur Respir J* 2012;**40**:283-5.
- 23 Doig GS, Simpson F. Randomization and allocation concealment: a practical guide for researchers. *J Crit Care* 2005;**20**:187-91.
- 24 Troosters T, Gosselink R, Decramer M. Short- and long-term effects of outpatient rehabilitation in patients with chronic obstructive pulmonary disease: a randomized trial. *Am J Med* 2000;**109**:207-12.
- 25 Puhan MA, Chandra D, Mosenifar Z, et al. The minimal important difference of exercise tests in severe COPD. *Eur Respir J* 2011;**37**:784-90.
- 26 Mathiowetz V, Dove M, Kashman N, et al. Grip and pinch strength: normative data for adults. *Arch Phys Med Rehabil* 1985;**66**:69-72.
- 27 Borg GA. Psychophysical bases of perceived exertion. *Med Sci Sports Exerc* 1982;**14**:377-81.
- 28 Langer D, Jacome C, Hoffman M, et al. Comparison of two high intensity inspiratory muscle training programs in patients with COPD: A randomized controlled trial. *Am J Respir Crit Care Med* **2013**; 187: A2566.
- 29 Black LF, Hyatt RE. Maximal respiratory pressures: normal values and relationship to age and sex. *Am Rev Respir Dis* 1969;**99**:696-702.
- 30 Rochester DF, Arora NS. Respiratory muscle failure. *Med Clin North Am* 1983;**67**:573-97.
- 31 Langer D, Jacome C, Charususin N, et al. Measurement validity of an electronic inspiratory loading device during a loaded breathing task in patients with COPD. *Respir Med* 2013;**107**:633-5.
- 32 Jones NL, Makrides L, Hitchcock C, et al. Normal standards for an incremental progressive cycle ergometer test. *Am Rev Respir Dis* 1985;**131**:700-8.

- 1  
2  
3 33 Yan S, Kaminski D, Sliwinski P. Reliability of inspiratory capacity for estimating end-expiratory lung  
4 volume changes during exercise in patients with chronic obstructive pulmonary disease. *Am J*  
5 *Respir Crit Care Med* 1997;**156**:55-9.  
6  
7  
8 34 Guyatt GH, Pugsley SO, Sullivan MJ, et al. Effect of encouragement on walking test performance.  
9 *Thorax* 1984;**39**:818-22.  
10  
11 35 Troosters T, Gosselink R, Decramer M. Six minute walking distance in healthy elderly subjects. *Eur*  
12 *Respir J* 1999;**14**:270-4.  
13  
14 36 Langer D, Gosselink R, Sena R, et al. Validation of two activity monitors in patients with COPD.  
15 *Thorax* 2009;**64**:641-2.  
16  
17  
18 37 Miller MR, Hankinson J, Brusasco V, et al. Standardisation of spirometry. *Eur Respir J* 2005;**26**:319-  
19 38.  
20  
21 38 MacIntyre N, Crapo RO, Viegi G, et al. Standardisation of the single-breath determination of  
22 carbon monoxide uptake in the lung. *Eur Respir J* 2005;**26**:720-35.  
23  
24 39 Decramer M. Corticosteroids contribute to muscle weakness in chronic airflow obstruction. 1994.  
25  
26  
27 40 Guyatt GH, Berman LB, Townsend M, et al. A measure of quality of life for clinical trials in chronic  
28 lung disease. *Thorax* 1987;**42**:773-8.  
29  
30 41 Puhan MA, Behnke M, Frey M, et al. Self-administration and interviewer-administration of the  
31 German Chronic Respiratory Questionnaire: instrument development and assessment of validity  
32 and reliability in two randomised studies. *Health Qual Life Outcomes* 2004;**2**:1.  
33  
34 42 Bourbeau J, Maltais F, Rouleau M, et al. French-Canadian version of the Chronic Respiratory and St  
35 George's Respiratory questionnaires: an assessment of their psychometric properties in patients  
36 with chronic obstructive pulmonary disease. *Can Respir J* 2004;**11**:480-6.  
37  
38 43 Wijkstra PJ, TenVergert EM, Van AR, et al. Reliability and validity of the chronic respiratory  
39 questionnaire (CRQ). *Thorax* 1994;**49**:465-7.  
40  
41  
42 44 Zigmond AS, Snaith RP. The hospital anxiety and depression scale. *Acta Psychiatr Scand*  
43 1983;**67**:361-70.  
44  
45 45 Vickers AJ, Altman DG. Statistics notes: Analysing controlled trials with baseline and follow up  
46 measurements. *BMJ* 2001;**323**:1123-4.  
47  
48  
49  
50  
51  
52  
53  
54  
55  
56  
57  
58  
59  
60

## Article summary

### Article focus

- Inspiratory muscle dysfunction occurs in patients with COPD and is associated with dyspnea and decreased exercise capacity.
- What are the additional functional and health benefits of adding home-based IMT to a general exercise training program in COPD patients with inspiratory muscle weakness?

### Key messages

- This multicentre randomised controlled trial will investigate and report on the additional improvements in exercise tolerance after adding IMT to a 3-months general exercise training program. Inspiratory muscle function, health-related quality of life, and daily physical activity, will be assessed as secondary outcomes.
- The study will focus on COPD patients with inspiratory muscle weakness defined as Pimax < 60cmH<sub>2</sub>O or < 50%pred.
- The variable flow resistive training method applies a specific training stimulus and allows full monitoring of the compliance with the home based IMT.

### Strengths and limitations of this study

- In contrast to previous studies, we designed a large, adequately powered, multi-centre randomised controlled trial to investigate the effects of IMT in COPD patients with inspiratory muscle weakness. The results from this study will help to clarify whether adjunctive IMT leads to greater functional improvements (exercise capacity, quality of life, participation in daily activity, and symptoms) than exercise training alone.

- 1  
2  
3 - The results will be focused on effects in COPD patients with inspiratory muscle weakness. The  
4 results of this study will therefore primarily be applicable in COPD patients with inspiratory  
5 muscle weakness.  
6  
7  
8  
9

### 10 **Background**

11  
12 Chronic Obstructive Pulmonary Disease (COPD) is a major cause of chronic morbidity and mortality  
13 worldwide.[1,2] COPD is characterized by persistent expiratory flow limitation that is usually  
14 progressive.[3] Dyspnea is the most prominent exercise-limiting symptom of the disease,[4] which leads  
15 to chronic avoidance of physical activities. Consequently, low physical activity levels contribute to  
16 skeletal muscle deconditioning and exercise capacity reduction, which impact negatively on health  
17 related quality of life.[5,6] Inspiratory muscle dysfunction is another extrapulmonary manifestation that  
18 is often present in patients with COPD.[7,8] It contributes to hypoxemia, hypercapnia, dyspnea and  
19 decreased exercise tolerance.[9-11] Pulmonary rehabilitation including exercise training, education,  
20 nutritional intervention, and psychosocial support is a standard care for COPD patients to counteract  
21 extrapulmonary disease manifestations.[6,12,13] Inspiratory muscle training (IMT) has also been applied  
22 frequently and is extensively studied in recent years in patients with COPD.[14] From meta-analyses of  
23 RCT's in patients with COPD it can be concluded that IMT as a standalone therapy improves  
24 inspiratory muscle function (strength and endurance), decreases symptoms of dyspnea, and improves  
25 exercise capacity.[14,15] The value of IMT as an add-on to a general exercise training program is  
26 however still under debate.[16-19] While IMT always results in significant improvements in inspiratory  
27 muscle function, its additional effects on more clinically relevant outcomes (e.g. functional exercise  
28 capacity and quality of life) are insufficiently supported by scientific evidence so far.[14] From subgroup  
29 analyses in the most recent meta-analysis it was concluded that significant additional effects of IMT on  
30 more clinically relevant outcomes are more likely to be found in patients with inspiratory muscle  
31  
32  
33  
34  
35  
36  
37  
38  
39  
40  
41  
42  
43  
44  
45  
46  
47  
48  
49  
50  
51  
52  
53  
54  
55  
56  
57  
58  
59  
60

1  
2  
3 weakness.[12] This was previously defined as a maximal inspiratory mouth pressure ( $P_{i,max}$ ) of less than  
4  
5 60cmH<sub>2</sub>O.[14] It has therefore been recommended that future studies in patients with COPD should  
6  
7 focus specifically on patients with more pronounced inspiratory muscle weakness.[14,20] It was recently  
8  
9 shown that adjunctive IMT led to significantly greater functional improvements in a well designed  
10  
11 randomised controlled trial in patients with chronic heart failure selected for inspiratory muscle  
12  
13 weakness.[21] Comparable RCTs in patients with COPD are so far lacking.[14] We are therefore carrying  
14  
15 out a large, adequately powered, multi-centre randomised controlled trial on the effects of IMT as an  
16  
17 adjunct therapy to a general exercise training program in COPD patients with inspiratory muscle  
18  
19 weakness. Recommendations on the use of IMT as an adjunct to general exercise training in these  
20  
21 patients in international guidelines are ambiguous.[12] The outcome of this study will therefore have a  
22  
23 direct impact on clinical practice, as the results will clarify whether adjunctive IMT leads to superior  
24  
25 clinically relevant improvements for COPD patients. Functional outcomes of relevance to patients  
26  
27 (exercise capacity, quality of life, participation in daily physical activity, and symptoms) were therefore  
28  
29 chosen as main outcomes.  
30  
31  
32  
33  
34

35 One of the hypotheses that links enhanced inspiratory muscle function to improvements in exercise  
36  
37 capacity is that IMT should allow the respiratory system of patients with COPD to work more  
38  
39 comfortably at high lung volumes during exercise.[22] In the present study we will use a recently  
40  
41 developed IMT device that applies a variable resistance provided by an electronically controlled valve  
42  
43 (variable flow resistive load). In contrast to the traditionally applied threshold loading, this variable flow  
44  
45 resistive load is specifically challenging the inspiratory muscles at higher lung volumes, and may lead to  
46  
47 larger training effects in COPD patients who develop dynamic hyperinflation during exercise. Besides  
48  
49 these potentially beneficial characteristics of the applied load another advantage of the device is the  
50  
51 ability to store home-based training data for up to 40 sessions. Continuous registrations of pressure and  
52  
53 flow at 500 Hz provide data on the external work of breathing and enable the verification of both  
54  
55  
56  
57  
58  
59  
60

1  
2  
3 quantity and quality of unsupervised training sessions. The latter is of particular importance since 85% of  
4  
5 the training sessions during this RCT will be performed by patients at their homes without supervision.  
6  
7

### 8 **Aims**

9  
10 This study will examine the effects of adding a well-controlled, high-intensity inspiratory muscle training  
11  
12 (IMT) program to a 3-month general exercise training program, using a large, multi-centre, randomised  
13  
14 controlled design, in COPD patients with inspiratory muscle weakness. Outcomes will be exercise  
15  
16 capacity (primary outcome), inspiratory muscle function, health-related quality of life (HRQL), and  
17  
18 participation in daily physical activity.  
19  
20

### 21 **Hypotheses**

22  
23 We hypothesize that the addition of IMT to a general exercise training program in patients with COPD  
24  
25 and inspiratory muscle weakness will result in superior improvements exercise capacity, inspiratory  
26  
27 muscle function, health-related quality of life (HRQL), and daily physical activity, compared with  
28  
29 general exercise training alone.  
30  
31  
32  
33

### 34 **Methods**

#### 35 **Patients**

36  
37 All patients with spirometry-proven COPD who are referred for outpatient pulmonary rehabilitation will  
38  
39 be screened for inclusion. Only patients with inspiratory muscle weakness ( $P_{i,max} < 60\text{cmH}_2\text{O}$  or  $<50\%$   
40  
41 predicted) will be eligible to participate in the study. Exclusion criteria consist of (1) diagnosed  
42  
43 psychiatric or cognitive disorders; (2) progressive neurological or neuromuscular disorders; (3) severe  
44  
45 orthopedic problems having a major impact on daily activities; (4) previous inclusion in rehabilitation  
46  
47 program ( $<1$  year).  
48  
49  
50  
51  
52  
53  
54  
55  
56  
57  
58  
59  
60

## Study design

Patients will be informed about the study protocol prior to the start of the rehabilitation program. Informed consent will be obtained at that time. Patients will be randomised into an intervention and a placebo group. Group allocation will be performed by simple randomization using sealed opaque envelopes in random block sizes of 4 and 6 (order unknown to investigators).[23]

Both groups will follow a general exercise training program as described previously.[24] The intervention group will receive an additional inspiratory muscle training program described to patients as 'resistance training' at a high intensity ( $\geq 50\%$  PI,max), whereas the placebo group will receive an inspiratory muscle training intervention described to patients as 'endurance training' at a low training intensity ( $\leq 10\%$  PI,max).

Measurements of primary and secondary endpoints will be undertaken before and after 3 months of rehabilitation. All tests will be performed by experienced investigators who are blinded to group allocation. To ensure consistency between centres all assessments should be performed according to the instructions agreed upon and described in a manual of procedures and an instructional video, even if they may differ slightly from usual local procedures. To further improve the consistency, the five centres will regularly receive a newsletter to update them on the progress of the study and to share eventual technical problems between centers. Staff from all participating centres will be able to contact the coordinating center in Leuven by e-mail or telephone in case they should have any questions concerning the study.

To detect a minimally clinically important difference between groups of 26m in the 6-minute walking distance (6MWD),[25] assuming a standard deviation of the within group differences in the 6MWD at the end of the intervention period of 60m in both groups with a degree of certainty (statistical power) of

1  
2  
3 80% and a risk for a type I error ( $\alpha$ ) < 5%, a sample size for both groups of 85 patients is needed, given  
4  
5 an anticipated dropout rate of 30%. This study will therefore be performed as a multi-centre  
6  
7 randomised controlled trial to ensure inclusion of 170 patients within a time-frame of two years. Besides  
8  
9 the lead centre at the University Hospital in Leuven, Belgium, patients will also be recruited in the  
10  
11 University Hospital Gent, Belgium; Schön Klinik Berchtesgadener Land, Germany; University Hospital  
12  
13 Nijmegen, The Netherlands; and Laval University Quebec, Canada. Each of the five centres is expected to  
14  
15 include between 30 to 40 patients within the two year inclusion period.  
16  
17  
18  
19

20  
21 In accordance with the Belgian law relating to experiments in humans dated May 7, 2004, KU/UZ Leuven  
22  
23 shall assume, even without fault, the responsibility of any damages incurred by a Subject and linked  
24  
25 directly or indirectly to the participation to the Study, and shall provide compensation therefore through  
26  
27 its insurance program. All collaborating sites shall have and maintain in full force and effect during the  
28  
29 term of this Agreement (and following termination of the Study to cover any claims arising from the  
30  
31 Study) adequate insurance coverage for: (i) medical professional and/or medical malpractice liability,  
32  
33 and (ii) general liability, and (iii) other possible damages resulting from the Study at the Institution  
34  
35 required by local law, each such insurance coverage in amounts appropriate to the conduct of the  
36  
37 services of the Participating Site under this Agreement.  
38  
39  
40  
41

## 42 Interventions

### 43 44 General exercise training

45  
46 Patients in both groups will follow a three-month general exercise training program. Patients will  
47  
48 perform cycling, treadmill walking, stair climbing, arm ergometry and resistance training of both arm  
49  
50 and leg muscles.[26] Training frequency will be three sessions per week, resulting in a total of 36 training  
51  
52 sessions. Duration of the training session will increase from 40-60 minutes at the start of the program to  
53  
54 60-90 minutes after 3 months. Patients will perform endurance training or interval training at moderate  
55  
56  
57  
58  
59  
60



1  
2  
3 to high intensity (initially 60% to 70% of maximal workload). The overall training intensity will be  
4  
5 increased gradually during the course of the program using a CR10 Borg scale rating of 4 to 6 on dyspnea  
6  
7 sensation or leg effort as a means of maintaining training overload.[27] Physiotherapists providing this  
8  
9 intervention will be blinded to group allocation of patients.  
10  
11

### 12 13 **Inspiratory muscle training program**

14  
15 Patients will receive either high intensity inspiratory muscle training ('strength training' = intervention  
16  
17 group) or low intensity placebo IMT ('endurance training' = placebo group). **The training load in this**  
18  
19 **study will be adjusted according to data from a previously performed pilot study about a home-based,**  
20  
21 **high intensity IMT programs in COPD patients with inspiratory muscle weakness.[28]** Total daily training  
22  
23 time for both groups will be 21 minutes, consisting of 6 cycles of 30 breaths (two cycles, three times  
24  
25 daily in the intervention group or three cycles, two times daily in the control group). There will be  
26  
27 approximately 3.5 minutes of resistive breathing during every cycle, each followed by one minute of  
28  
29 resting. Patients will train 7 days per week, for 12 weeks using the PowerBreathe KH1 device  
30  
31 (POWERbreathe®KH1, HaB International Ltd., Southam, UK). This handheld device applies a variable  
32  
33 resistance provided by an electronically controlled valve (variable flow resistive load). Loading is  
34  
35 maintained at the same relative intensity throughout the breath, by reducing the absolute load to  
36  
37 accommodate the pressure-volume relationship of the inspiratory muscles. The application of a tapered  
38  
39 load allows patients to get close to maximal inspiration, even at high training intensities (Figure 1).  
40  
41  
42  
43  
44  
45  
46  
47  
48  
49  
50  
51  
52  
53  
54  
55  
56  
57  
58  
59  
60

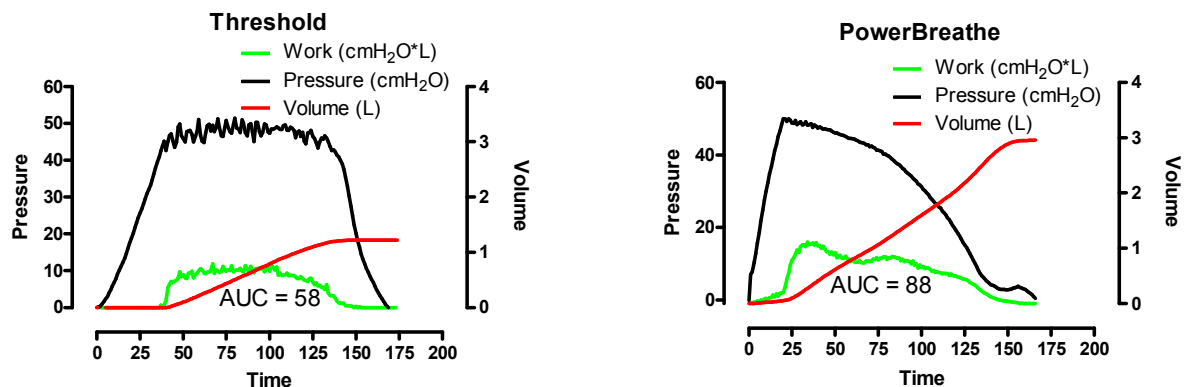

Figure 1: Comparison between constant threshold (Threshold) and variable resistive IMT (POWERbreathe® KH1).

AUC = Area Under Curve

Figure 1 illustrates a comparison of a single breath (training at an intensity of 60%  $P_{i,max}$ ) using a conventional constant threshold loading device, with that of a variable flow resistive loading device (POWERBreathe® KH1).<sup>[28]</sup> It is apparent from this figure that, in contrast to the threshold loading, the variable flow resistive load overloads the inspiratory muscles at higher lung volumes. Since one of the hypotheses that links enhanced inspiratory muscle function to improvements in exercise capacity is that IMT may allow the respiratory system of patients with COPD to work more comfortably at high lung volumes during exercise,<sup>[22]</sup> we hypothesize that this variable flow resistive IMT should be better suited to reduce inspiratory effort ( $P_{es}/P_{i,max}$ ) during whole body exercise. Besides these hypothetically beneficial characteristics of the applied load, a further advantage of the electronic leading device is the ability to store parameters of up to 40 IMT sessions. Continuous registrations of pressure and flow at 500Hz provide data on the external work of breathing and enable us to control both quantity and quality of unsupervised training sessions. This is of special importance since 85% of the training sessions during this RCT will be performed by patients at their homes without supervision. The device stores data on average mean pressure (cmH<sub>2</sub>O), average mean power per breath (Watt), average peak flow per breath (L/s) and total work of breathing during one session of 30 breaths (Joules). Patients will be instructed to

1  
2  
3 perform fast and forceful inspirations and will be encouraged to achieve maximal inhalation and  
4  
5 exhalation with every breath. This breathing pattern will be supported by acoustic signals from the  
6  
7 loading device.  
8  
9

10 The intervention group will commence training at 40% of their initial  $P_{i,max}$ . Intermediate  
11  
12 measurements of  $P_{i,max}$  will be performed every week. These  $P_{i,max}$  values will be used to calculate  
13  
14 the training load to be implemented the following week. In other words, the training load in each week  
15  
16 will be increased continuously over time by adjusting to at least 50% of the  $P_{i,max}$  value recorded in the  
17  
18 previous week. Rates of perceived inspiratory effort on a modified CR 10 Borg-Scale (4-6 out of 10) will  
19  
20 also be used to support decisions on training load increments. The control group will train at an  
21  
22 inspiratory load of 10% of their initial  $P_{i,max}$ . This training intensity will not be changed during the study  
23  
24 period. Each week, three training sessions will be performed under supervision at the outpatient clinic.  
25  
26 During these supervised sessions the results of unsupervised sessions will be evaluated and patients will  
27  
28 receive instructions and feedback on their training efforts. Resting periods will be given as needed as  
29  
30 long as patients are able to complete the full volume of training that is prescribed. Training intensity in  
31  
32 the intervention group will be adapted during these supervised sessions.  
33  
34  
35  
36

37 When patients experience acute exacerbations or respiratory infections, they will temporarily interrupt  
38  
39 their participation in the rehabilitation and IMT program. Based on guidance from the treating  
40  
41 pulmonologist they will however return to the program as quickly as possible. Periods of infections,  
42  
43 exacerbations, and hospitalizations will be registered and their stay in the program will be prolonged in  
44  
45 order to complete 12 weeks of IMT training program.  
46  
47  
48

### 49 Outcome measures

50  
51 Table 1 provides an overview of the outcome measures at different time points in the study.  
52  
53  
54

55 **Table 1.** Outcome measurements  
56  
57  
58  
59  
60

|                                   | Start | 3 months |
|-----------------------------------|-------|----------|
| Screen                            | X     |          |
| Informed consent                  | X     |          |
| Respiratory muscle strength       | X     | X        |
| Inspiratory muscle endurance      | X     | X        |
| Maximal exercise capacity         | X     | X        |
| Endurance exercise capacity       | X     | X        |
| Six-minute walking distance       | X     | X        |
| Daily physical activity (7 days): | X     | X        |
| Pulmonary function                | X     | X        |
| Quadriceps force                  | X     | X        |
| Handgrip force                    | X     | X        |
| CRDQ <sup>#</sup>                 | X     | X        |
| HADS <sup>*</sup>                 | X     | X        |

<sup>#</sup>CRDQ = Chronic Respiratory Disease Questionnaire (HRQL), <sup>\*</sup>HADS = Hospital Anxiety and Depression

Scale

*Respiratory muscle force*

Maximal voluntary respiratory pressures will be registered at the mouth to assess respiratory muscle force. Measurements will be performed from total lung capacity for maximal expiratory pressure ( $P_{e,max}$ ) or residual volume for maximal inspiratory pressure ( $P_{i,max}$ ) using the technique proposed by Black and Hyatt.[29] An electronic pressure transducer will be used (MicroRPM; Micromedical, Kent, UK). Assessments will be repeated at least 5 times (30 seconds recovery between attempts), and should be continued until at least good reproducibility has been achieved from the three best measurements

1  
2  
3 (within 10 cmH<sub>2</sub>O difference among measurements). Reference values published by Rochester and Arora  
4  
5 will be used to define normal respiratory muscle force.[30]  
6  
7

### 8 9 *Inspiratory muscle endurance*

10  
11 To measure inspiratory muscle endurance patients will be asked to breathe against a submaximal  
12  
13 inspiratory load provided by the flow resistive loading device (POWERbreathe®KH1, HaB International  
14  
15 Ltd., Southam, UK) until task failure. The inspiratory load that will be selected (typically between 50-60%  
16  
17 of the Pi,max) will typically allow patients to continue breathing against the resistance for 3-7 minutes.  
18  
19 Breathing instructions for patients will be the same as during the training sessions. Number of breaths,  
20  
21 average duty cycle (inspiratory time as a fraction of the total respiratory cycle duration), average mean  
22  
23 load, average mean power, and total external inspiratory work will be recorded during the test by the  
24  
25 handheld loading device. We have recently performed a validation of the parameters that are recorded  
26  
27 during this test and found excellent agreement between the handheld loading device and  
28  
29 measurements performed with external, laboratory measurement equipment.[31] After 12 weeks of  
30  
31 IMT the endurance test will be repeated using an identical load. Improvements in endurance time and  
32  
33 breathing parameters will be recorded.  
34  
35  
36  
37  
38

### 39 40 *Maximal exercise capacity (incremental exercise test)*

41  
42  
43 Maximal exercise capacity will be assessed by a maximal incremental cycle exercise test (Ergometrics  
44  
45 900, Ergoline, Bitz, Germany). After a two-minute resting period and three minutes of unloaded cycling,  
46  
47 patients will start cycling at a load of 20 Watt. Load will then be increased by 10 Watt per minute and  
48  
49 patients will cycle until symptom limitation. Oxygen uptake, carbon dioxide output and ventilation will  
50  
51 be measured breath by breath (Vmax series, SensorMedics, Anaheim, CA). Heart rate and oxygen  
52  
53 saturation will be recorded continuously. Maximal oxygen uptake will be compared with normal  
54  
55  
56  
57  
58  
59  
60

1  
2  
3 values.[32] The perception of dyspnea and leg effort will be quantified at two-minute intervals during  
4  
5 exercise and at the end of the test using the modified Borg scale.[27] Development of dynamic  
6  
7 hyperinflation during the exercise test will be assessed by recording changes in end-expiratory lung  
8  
9 volumes. Patients will be instructed to perform maximal inspiratory maneuvers after a normal expiration  
10  
11 during resting breathing and at the end of each level of exercise. Assuming a constant total lung capacity  
12  
13 a decrease in inspiratory capacity will indicate an increase in end expiratory lung volume, which  
14  
15 indicates the degree of dynamic hyperinflation.[33] Tidal volume ( $V_T$ ), inspiratory time ( $T_I$ ), total time of  
16  
17 the respiratory cycle ( $T_{TOT}$ ) and respiratory frequency (fR) will be assessed. The  $T_I/T_{TOT}$  (duty cycle)  
18  
19 represents the proportion of the breath during which the inspiratory muscles are contracting.  
20  
21  
22  
23

#### 24 25 *Endurance exercise capacity (constant work rate test)*

26  
27  
28 A constant power output cycle test until symptom limitation will be performed at 80% of the maximal  
29  
30 power output (in Watts) that was reached during the initial incremental exercise test (Ergometrics 900,  
31  
32 Ergoline, Bitz, Germany). Oxygen uptake, carbon dioxide output and minute ventilation will be measured  
33  
34 breath by breath (Vmax series, SensorMedics, Anaheim, CA). Breathing pattern and dynamic  
35  
36 hyperinflation will be monitored as described previously for the incremental cardiopulmonary exercise  
37  
38 test. Heart rate and oxygen saturation will be monitored continuously. The perception of dyspnea and  
39  
40 leg effort will be quantified at two-minute intervals during exercise and at the end of the test using the  
41  
42 modified CR10 Borg scale.[27]  
43  
44  
45

#### 46 47 *6-minute walking distance (6MWD)*

48  
49  
50 Functional exercise performance will be measured using a six-minute walking test in a 50m corridor.  
51  
52 Standardized encouragement will be provided.[34] The best of two tests separated by recovery time 30  
53  
54  
55  
56  
57  
58  
59  
60

1  
2  
3 minutes will be used and related to reference values.[35] Oxygen saturation, heart rate and symptoms  
4  
5 of leg effort and dyspnea will be recorded before and after the test.  
6  
7

#### 8 9 *Physical activity monitoring*

10  
11 Measurements will be performed with an accelerometer-based activity monitor (DynaPort Minimod,  
12  
13 McRoberts BV, The Hague, The Netherlands). The Minimod is a small (64x62x13mm) and lightweight  
14  
15 device (68gram, including batteries) that contains a three-axial piezocapacitive sensor measuring at high  
16  
17 time-resolution (100Hz). Analysis of raw data allows for classification of intensity, duration and  
18  
19 frequency of movement. Different postures and walking are identified and energy expenditure is  
20  
21 estimated. The Minimod has been validated in patients with COPD.[36] Assessments will be undertaken  
22  
23 on seven consecutive days during waking hours.  
24  
25  
26  
27

#### 28 29 *Pulmonary function*

30  
31 Spirometry and whole body plethysmography will be performed according to the European Respiratory  
32  
33 Society guidelines for pulmonary function testing (Vmax Autobox, Sensor Medics, Bilthoven, the  
34  
35 Netherlands).[37] Diffusing capacity for carbon monoxide will be measured by the single breath method  
36  
37 (Sensor Medics 6200, Bilthoven, the Netherlands).[38]  
38  
39  
40  
41

#### 42 43 *Peripheral muscle force*

44  
45 Isometric quadriceps force will be quantified using a Cybex Norm Dynamometer (Cybex<sup>®</sup> Norm, Enraf  
46  
47 Nonius, Delft, the Netherlands). Peak extension torque will be measured at 60° of knee flexion. At least  
48  
49 three measurements will be obtained and the highest reproducible value (within 11%) will be taken into  
50  
51 analysis. Reference values have been developed in our laboratory.[39]  
52  
53  
54  
55  
56  
57  
58  
59  
60

1  
2  
3 Isometric hand grip force will be measured using a hydraulic hand grip dynamometer (Jamar Preston,  
4 Jackson, MI). Peak force will be assessed with the elbow fixed to the rib cage and flexed 90° and with the  
5 wrist in neutral position. At least three measurements will be obtained and the highest reproducible  
6 value will be taken into analysis and related to reference values.[26]  
7  
8  
9

### 10 11 12 *Health-related quality of life*

13  
14  
15 The Chronic Respiratory Disease Questionnaire (CRDQ) will be used to assess health-related quality of  
16 life.[40] This 20-item questionnaire scores quality of life in 4 domains (dyspnea, mastery, emotional  
17 functioning and fatigue) and has been validated in the Dutch, German and French language.[41-43] The  
18 total score can range from 20 to 140 with higher scores indicating better quality of life.  
19  
20  
21  
22  
23  
24

### 25 26 27 *Anxiety and depression*

28  
29 The Hospital Anxiety and Depression Scale (HADS) will be used to assess emotional distress.[44] The  
30 HADS consists of 14 items and has separate scores for anxiety (7 items) and depression (7 items). A  
31 score of 11 or greater on either of the sub-scales suggests clinically significant symptoms of anxiety or  
32 depression.  
33  
34  
35  
36  
37  
38  
39

## 40 41 **Statistical analysis**

42 Differences in primary and secondary outcomes between groups after 3-months of intervention will be  
43 compared adjusting for baseline differences using analysis of covariance (ANCOVA).[45] Both an  
44 'intention-to-treat' and a 'per-protocol' analysis will be carried out to compare outcomes between  
45 groups.  
46  
47  
48  
49  
50  
51

## 52 53 **Ethics and dissemination**



1  
2  
3 Ethics approval has been obtained from relevant centre committees. The results from the randomised  
4  
5 controlled trial of IMT will be submitted for publication.  
6  
7

## 8 9 Discussion

10  
11 This large, adequately powered, multi-centre randomised controlled trial will investigate effects of IMT  
12  
13 as an adjunct to a general exercise training program. Outcomes will be exercise capacity (primary  
14  
15 outcome), health related quality of life, and participation in daily physical activity in the selected COPD  
16  
17 patients who have pronounced inspiratory muscle weakness. The IMT in this RCT will be performed  
18  
19 using the variable flow resistive loading device described previously (POWERbreathe®KH1, HaB  
20  
21 International Ltd., Southam, UK) and validated.[31] Besides the hypothetically beneficial characteristics  
22  
23 of the applied load described above, a further advantage of this device is the ability to store training  
24  
25 parameters of up to 40 sessions. Continuous recording of pressure and flow enable us to monitor both  
26  
27 the quantity and quality of unsupervised training sessions. The latter is of special importance, since 85%  
28  
29 of IMT sessions will be undertaken by patients in their homes, without supervision.  
30  
31  
32

33  
34 We anticipate that the outcomes of this study will be of direct relevance to clinical practice. The results  
35  
36 of this study should therefore be incorporated immediately into evidence based treatment  
37  
38 recommendations for clinical practice. During the communication of these recommendations it will be  
39  
40 of special importance to stress that the results obtained in this RCT will limited to the selected group of  
41  
42 patients with COPD, i.e. those with inspiratory muscle weakness.  
43  
44  
45  
46  
47

## 48 Reference List

- 49  
50  
51  
52 1 Mannino DM, Buist AS. Global burden of COPD: risk factors, prevalence, and future trends. *Lancet*  
53 2007;**370**:765-73.  
54  
55  
56  
57

- 1
  - 2
  - 3
  - 4
  - 5
  - 6
  - 7
  - 8
  - 9
  - 10
  - 11
  - 12
  - 13
  - 14
  - 15
  - 16
  - 17
  - 18
  - 19
  - 20
  - 21
  - 22
  - 23
  - 24
  - 25
  - 26
  - 27
  - 28
  - 29
  - 30
  - 31
  - 32
  - 33
  - 34
  - 35
  - 36
  - 37
  - 38
  - 39
  - 40
  - 41
  - 42
  - 43
  - 44
  - 45
  - 46
  - 47
  - 48
  - 49
  - 50
  - 51
  - 52
  - 53
  - 54
  - 55
  - 56
  - 57
  - 58
  - 59
  - 60
- 2 Rabe KF, Hurd S, Anzueto A, et al. Global strategy for the diagnosis, management, and prevention of chronic obstructive pulmonary disease: GOLD executive summary. *Am J Respir Crit Care Med* 2007;**176**:532-55.
- 3 Global Initiative for Chronic Obstructive Lung Disease (GOLD). *Global Strategy for the Diagnosis, Management and Prevention of COPD*. available at: <http://www.goldcopd.org/> . 2011.  
Ref Type: Internet Communication
- 4 O'Donnell DE, Travers J, Webb KA, et al. Reliability of ventilatory parameters during cycle ergometry in multicentre trials in COPD. *Eur Respir J* 2009;**34**:866-74.
- 5 Hamilton N, Killian KJ, Summers E, et al. Muscle strength, symptom intensity, and exercise capacity in patients with cardiorespiratory disorders. *Am J Respir Crit Care Med* 1995;**152**:2021-31.
- 6 Lacasse Y, Goldstein R, Lasserson TJ, et al. Pulmonary rehabilitation for chronic obstructive pulmonary disease. *Cochrane Database Syst Rev* 2006;CD003793.
- 7 Decramer M, Demedts M, Rochette F, et al. Maximal transrespiratory pressures in obstructive lung disease. *Bull Eur Physiopathol Respir* 1980;**16**:479-90.
- 8 Polkey MI, Kyroussis D, Hamnegard CH, et al. Diaphragm strength in chronic obstructive pulmonary disease. *Am J Respir Crit Care Med* 1996;**154**:1310-7.
- 9 Laghi F, Tobin MJ. Disorders of the respiratory muscles. *Am J Respir Crit Care Med* 2003;**168**:10-48.
- 10 Begin P, Grassino A. Inspiratory muscle dysfunction and chronic hypercapnia in chronic obstructive pulmonary disease. *Am Rev Respir Dis* 1991;**143**:905-12.
- 11 Gosselink R, Troosters T, Decramer M. Peripheral muscle weakness contributes to exercise limitation in COPD. *Am J Respir Crit Care Med* 1996;**153**:976-80.
- 12 Nici L, Donner C, Wouters E, et al. American Thoracic Society/European Respiratory Society statement on pulmonary rehabilitation. *Am J Respir Crit Care Med* 2006;**173**:1390-413.
- 13 Ries AL, Bauldoff GS, Carlin BW, et al. Pulmonary Rehabilitation: Joint ACCP/AACVPR Evidence-Based Clinical Practice Guidelines. *Chest* 2007;**131**:4S-42S.
- 14 Gosselink R, De VJ, van den Heuvel SP, et al. Impact of inspiratory muscle training in patients with COPD: what is the evidence? *Eur Respir J* 2011;**37**:416-25.
- 15 Geddes EL, O'Brien K, Reid WD, et al. Inspiratory muscle training in adults with chronic obstructive pulmonary disease: an update of a systematic review. *Respir Med* 2008;**102**:1715-29.
- 16 Ambrosino N. The case for inspiratory muscle training in COPD. *Eur Respir J* 2011;**37**:233-5.
- 17 McConnell AK. CrossTalk opposing view: respiratory muscle training does improve exercise tolerance. *J Physiol* 2012;**590**:3397-8.

- 1  
2  
3  
4  
5  
6  
7  
8  
9  
10  
11  
12  
13  
14  
15  
16  
17  
18  
19  
20  
21  
22  
23  
24  
25  
26  
27  
28  
29  
30  
31  
32  
33  
34  
35  
36  
37  
38  
39  
40  
41  
42  
43  
44  
45  
46  
47  
48  
49  
50  
51  
52  
53  
54  
55  
56  
57  
58  
59  
60
- 18 Patel MS, Hart N, Polkey MI. CrossTalk proposal: training the respiratory muscles does not improve exercise tolerance. *J Physiol* 2012;**590**:3393-5.
- 19 Polkey MI, Moxham J, Green M. The case against inspiratory muscle training in COPD. *Against. Eur Respir J* 2011;**37**:236-7.
- 20 Decramer M. Response of the respiratory muscles to rehabilitation in COPD. *J Appl Physiol* 2009;**107**:971-6.
- 21 Winkelmann ER, Chiappa GR, Lima CO, et al. Addition of inspiratory muscle training to aerobic training improves cardiorespiratory responses to exercise in patients with heart failure and inspiratory muscle weakness. *Am Heart J* 2009;**158**:768-7.
- 22 Luo YM, Hopkinson NS, Polkey MI. Tough at the top: must end-expiratory lung volume make way for end-inspiratory lung volume? *Eur Respir J* 2012;**40**:283-5.
- 23 Doig GS, Simpson F. Randomization and allocation concealment: a practical guide for researchers. *J Crit Care* 2005;**20**:187-91.
- 24 Troosters T, Gosselink R, Decramer M. Short- and long-term effects of outpatient rehabilitation in patients with chronic obstructive pulmonary disease: a randomized trial. *Am J Med* 2000;**109**:207-12.
- 25 Puhan MA, Chandra D, Mosenifar Z, et al. The minimal important difference of exercise tests in severe COPD. *Eur Respir J* 2011;**37**:784-90.
- 26 Mathiowetz V, Dove M, Kashman N, et al. Grip and pinch strength: normative data for adults. *Arch Phys Med Rehabil* 1985;**66**:69-72.
- 27 Borg GA. Psychophysical bases of perceived exertion. *Med Sci Sports Exerc* 1982;**14**:377-81.
- 28 Langer D, Jacome C, Hoffman M, et al. Comparison of two high intensity inspiratory muscle training programs in patients with COPD: A randomized controlled trial. *Am J Respir Crit Care Med* **2013**; **187**: A2566.
- 29 Black LF, Hyatt RE. Maximal respiratory pressures: normal values and relationship to age and sex. *Am Rev Respir Dis* 1969;**99**:696-702.
- 30 Rochester DF, Arora NS. Respiratory muscle failure. *Med Clin North Am* 1983;**67**:573-97.
- 31 Langer D, Jacome C, Charususin N, et al. Measurement validity of an electronic inspiratory loading device during a loaded breathing task in patients with COPD. *Respir Med* 2013;**107**:633-5.
- 32 Jones NL, Makrides L, Hitchcock C, et al. Normal standards for an incremental progressive cycle ergometer test. *Am Rev Respir Dis* 1985;**131**:700-8.

- 1  
2  
3 33 Yan S, Kaminski D, Sliwinski P. Reliability of inspiratory capacity for estimating end-expiratory lung  
4 volume changes during exercise in patients with chronic obstructive pulmonary disease. *Am J*  
5 *Respir Crit Care Med* 1997;**156**:55-9.  
6  
7  
8 34 Guyatt GH, Pugsley SO, Sullivan MJ, et al. Effect of encouragement on walking test performance.  
9 *Thorax* 1984;**39**:818-22.  
10  
11 35 Troosters T, Gosselink R, Decramer M. Six minute walking distance in healthy elderly subjects. *Eur*  
12 *Respir J* 1999;**14**:270-4.  
13  
14 36 Langer D, Gosselink R, Sena R, et al. Validation of two activity monitors in patients with COPD.  
15 *Thorax* 2009;**64**:641-2.  
16  
17  
18 37 Miller MR, Hankinson J, Brusasco V, et al. Standardisation of spirometry. *Eur Respir J* 2005;**26**:319-  
19 38.  
20  
21 38 MacIntyre N, Crapo RO, Viegi G, et al. Standardisation of the single-breath determination of  
22 carbon monoxide uptake in the lung. *Eur Respir J* 2005;**26**:720-35.  
23  
24 39 Decramer M. Corticosteroids contribute to muscle weakness in chronic airflow obstruction. 1994.  
25  
26 40 Guyatt GH, Berman LB, Townsend M, et al. A measure of quality of life for clinical trials in chronic  
27 lung disease. *Thorax* 1987;**42**:773-8.  
28  
29  
30 41 Puhan MA, Behnke M, Frey M, et al. Self-administration and interviewer-administration of the  
31 German Chronic Respiratory Questionnaire: instrument development and assessment of validity  
32 and reliability in two randomised studies. *Health Qual Life Outcomes* 2004;**2**:1.  
33  
34 42 Bourbeau J, Maltais F, Rouleau M, et al. French-Canadian version of the Chronic Respiratory and St  
35 George's Respiratory questionnaires: an assessment of their psychometric properties in patients  
36 with chronic obstructive pulmonary disease. *Can Respir J* 2004;**11**:480-6.  
37  
38 43 Wijkstra PJ, TenVergert EM, Van AR, et al. Reliability and validity of the chronic respiratory  
39 questionnaire (CRQ). *Thorax* 1994;**49**:465-7.  
40  
41  
42 44 Zigmond AS, Snaith RP. The hospital anxiety and depression scale. *Acta Psychiatr Scand*  
43 1983;**67**:361-70.  
44  
45 45 Vickers AJ, Altman DG. Statistics notes: Analysing controlled trials with baseline and follow up  
46 measurements. *BMJ* 2001;**323**:1123-4.  
47  
48  
49  
50  
51  
52  
53  
54  
55  
56  
57  
58  
59  
60

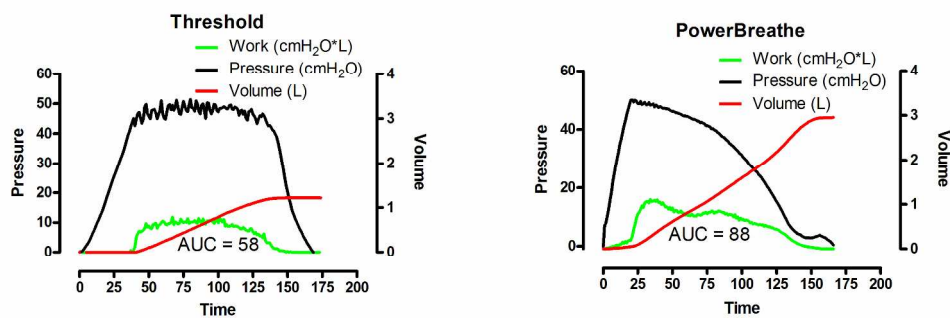

(Figure 1)  
250x91mm (300 x 300 DPI)

peer review only
